# Supplementary material for: Rational understanding of substituent effects on multi carbazole thermally activated delayed fluorescence emitters
Source: Royal Society of Chemistry journal article supplement (doi:10.1039/d2tc00669c), 2022-01-01
Supplement: d2tc00669c1.pdf [file d2tc00669c1.pdf]

## Supporting Information

# Rational Understanding of Substituent Effects on Multi Carbazole Thermally Activated Delayed Fluorescent Emitters

Jingwan Kim<sup>1†</sup>, Chul Woong Joo<sup>2,3†</sup>, Seung-Je Woo<sup>4†</sup>, Jiyong Park<sup>5,6†</sup>, Jonghee Lee<sup>7,\*</sup>, and  
Yun-Hi Kim<sup>1,\*</sup>

<sup>1</sup>*Department of Chemistry and RIGET, Gyeongsang National University, Jinju, 52828,  
Republic of Korea*

<sup>2</sup>*Reality Display Research Section, Electronics and Telecommunications Research  
Institute (ETRI), 218 Gajeong-ro, Yuseong-gu, Daejeon 34129, Republic of Korea*

<sup>3</sup>*SKKU Advanced Institute of Nanotechnology (SAINT), Sungkyunkwan University, Suwon  
16419, Republic of Korea*

<sup>4</sup>*Research Institute of Advanced Materials (RIAM), Seoul National University, Seoul  
08826, South Korea*

<sup>5</sup>*Center for Catalytic Hydrocarbon Functionalizations, Institute for Basic Science (IBS),  
Daejeon 34141, Republic of Korea*

<sup>6</sup>*Department of Chemistry, Korea Advanced Institute of Science and Technology (KAIST),  
Daejeon 34141, Republic of Korea.*

<sup>7</sup>*Department of Creative Convergence Engineering, Hanbat National University, Daejeon,  
34158, Republic of Korea*

†These authors contributed equally to this work

\*Corresponding authors.

[jonghee.lee@hanbat.ac.kr](mailto:jonghee.lee@hanbat.ac.kr) (Prof. J. Lee),

[ykim@gnu.ac.kr](mailto:ykim@gnu.ac.kr) (Prof. Y.-H. Kim)

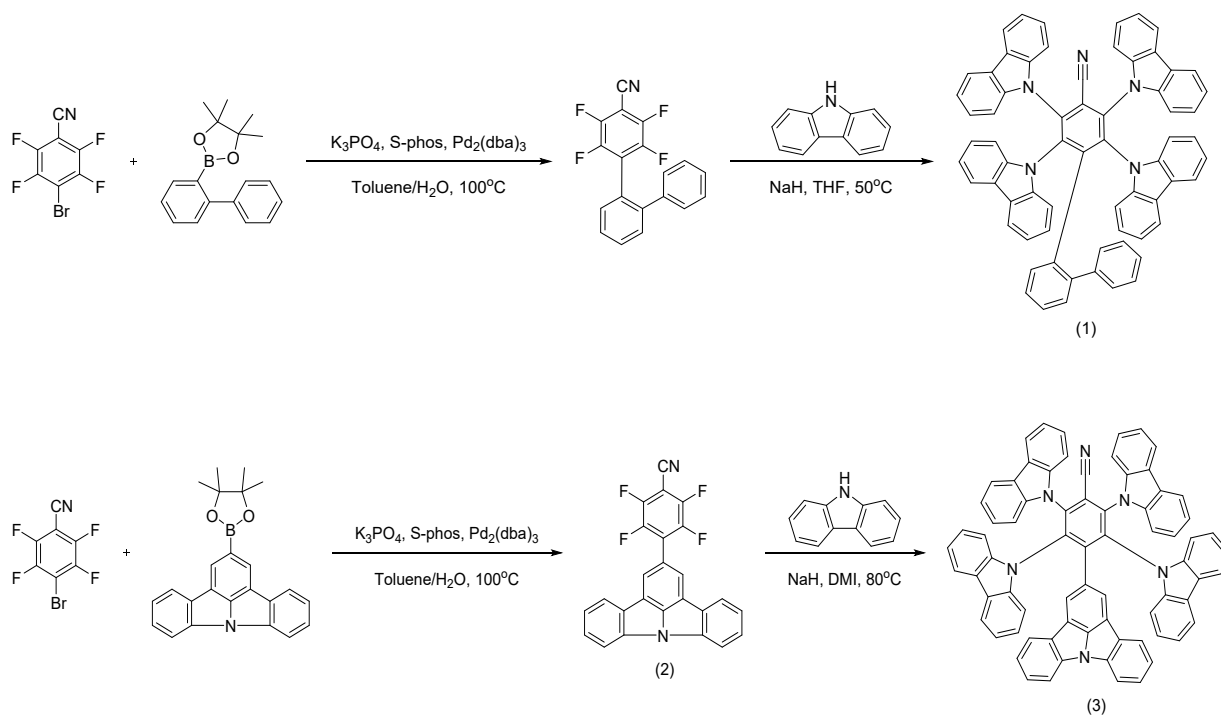

**Scheme S1.** Synthesis of 4CzBN-BP and 4CzBN-IDCz.

## Experimental Section

**Materials.** All starting materials were commercially available from Aldrich, Alfa Aesar and TCI and were used without further purification. All solvents were purified prior to use and were purified by passage under a nitrogen atmosphere.

**Characterization.**  $^1\text{H}$  NMR spectra were recorded using a Bruker 300 MHz spectrometer and  $^{13}\text{C}$  NMR spectra were recorded using a Bruker DRX 500 MHz spectrometer. High resolution mass analysis was measured using a Joel JMS-700. Thermal analysis was performed using a TA 2050 TGA thermogravimetric analyzer under a nitrogen atmosphere at a heating rate of  $10^\circ\text{C}/\text{min}$ . Differential scanning calorimeter (DSC) was conducted under nitrogen atmosphere using a TA instrument 2100 DSC. The samples were heated at  $10^\circ\text{C}/\text{min}$  from  $10^\circ\text{C}$  to  $400^\circ\text{C}$ . Cyclic voltammetry (CV) was performed at a room temperature in a  $0.1\text{ M}$  solution of tetrabutylammonium perchlorate ( $\text{Bu}_4\text{NClO}_4$ ) in chloroform under nitrogen gas at a scan rate of  $50\text{ mV/s}$ . A Pt wire was used as the counter electrode and an Ag/AgCl electrode as the reference electrode.

### ***Synthesis of [1,1':2',1''-terphenyl]-4-carbonitrile (BN-p-BP).***

The reaction followed by literature method.<sup>1</sup> The crude material was isolated by column chromatography using DCM/n-hexane (1:6) as eluent to give a white solid (BN-p-BP). (3 g, 70% yield). <sup>1</sup>H NMR (300 MHz, CD<sub>2</sub>Cl<sub>2</sub>): δ = 7.56-7.46 (m, 6H), 7.30-7.26 (m, 5H), 7.16-7.13 (m, 2H).

### ***Synthesis of 2,3,5,6-tetra(9H-carbazol-9-yl)-[1,1':2',1''-terphenyl]-4-carbonitrile (1) (4CzBN-BP)***

9H-carbazole (1.87 g, 11.16 mmol) and sodium hydride (60% dispersion in mineral oil, 0.27 g, 11.16 mmol) were dissolved in tetrahydrofuran (15 mL). The solution was stirred for 1 h at 50 °C under nitrogen atmosphere. (2,3,5,6-Tetrafluoro-[1,1':2',1''-terphenyl]-4-carbonitrile (0.61 g, 1.86 mmol) was added to the solution, then yellow solid was obtained. The yellow solid was filtered and washed with water three times and washed with methanol for remained 9H-Carbazole. The crude product was purified by column chromatography using dichloromethane/hexane (1/1). (yield: 0.76 g, 44.7%) <sup>1</sup>H NMR (300 MHz, CD<sub>2</sub>Cl<sub>2</sub>): δ (ppm) = 7.83 (d, 2H, *J*=7.4 Hz), 7.72 (dd, 4H, *J*=8.1Hz, *J*=9.4Hz), 7.60 (d, 2H, *J*=8.2Hz), 7.52 (d, 2H, *J*=7.8Hz), 7.42 (t, 2H, *J*=8.3Hz), 7.379-7.306 (m, 5H), 7.296-7.204 (m, 4H), 7.193-7.102 (m, 4H), 7.066-6.928 (m, 8H), 6.79 (m, 3H), 6.45 (dq, 3H, *J*=1.3Hz, *J*=8.3Hz), 6.33 (d, 1H, *J*=8.3Hz) <sup>13</sup>C NMR (500mHz, CDCl<sub>3</sub>) δ 150.14, 141.15, 139.98, 139.83, 139.47, 138.95, 138.89, 138.79, 131.14, 130.5, 129.98, 129.09, 128.96, 128.83, 127.79, 125.99, 125.63, 125.17, 125.11, 124.98, 123.88, 123.83, 123.55, 122.76, 121.06, 120.76, 120.63, 120.23, 119.88, 119.78, 119.67, 118.82, 117.79, 112.76, 110.56, 110.31, 110.16 HRMS (EI, m/z): calcd for C<sub>67</sub>H<sub>41</sub>N<sub>5</sub> 915.3362, found 916.3445.

### ***Synthesis of 2,3,5,6-tetrafluoro-4-(indolo[3,2,1-jk]carbazol-2-yl)benzonitrile (2) (4FBN-ICz)***

4-Bromo-2,3,5,6-tetrafluorobenzonitrile (3.00 g, 11.8 mmol) and 2-(4,4,5,5-tetramethyl-1,3,2-dioxaborolan-2-yl)indolo[3,2,1-jk]carbazole (6.51 g, 17.6 mmol) were dissolved in toluene/H<sub>2</sub>O (100 mL/25 mL). 2-Dicyclohexyl phosphino-2',6'-dimethoxybiphenyl (S-phos) (0.728 g, 1.76 mmol) and K<sub>3</sub>PO<sub>4</sub> (7.522 g, 35.4 mmol) added to the solution, and then bubbling with nitrogen for 20 min. Pd<sub>2</sub>(dba)<sub>3</sub> (0.54 g, 0.58 mmol) put into the reaction flask, the mixture was stirred for 12 h at 100 °C under nitrogen atmosphere. After cooling down to room temperature, dichloromethane and water were added to the reaction mixture. The phase was

separated and the aqueous layer was extracted with dichloromethane for three times. The combined organic phase was dried over anhydrous  $\text{MgSO}_4$ . The crude product purified by column chromatography using dichloromethane/hexane (2/1) (yield: 0.98 g, 20%)  $^1\text{H}$  NMR (300 MHz,  $\text{CD}_2\text{Cl}_2$ ):  $\delta$  (ppm) = 8.25 (ddd, 1H,  $J=0.8\text{Hz}$ ,  $J=1.2\text{Hz}$ ,  $J=7.8\text{Hz}$ ), 8.20 (t, 2H,  $J=1.6\text{Hz}$ ), 8.05 (td, 2H,  $J=0.8\text{Hz}$ ,  $J=8.1\text{Hz}$ ), 7.70 (t, 2H,  $J=7.8\text{Hz}$ ), 7.48 7.48 (dt, 2H,  $J=1.0\text{Hz}$ ,  $J=7.8\text{Hz}$ ) HRMS (EI, m/z): calcd for  $\text{C}_{25}\text{H}_{10}\text{F}_4\text{N}_2$  414.0780, found 414.0771.

***Synthesis of 2,3,5,6-tetra(9H-carbazol-9-yl)-4-(indolo[3,2,1-jk]carbazol-2-yl)benzotrile (3) (4CzBN-ICz)***

9H-carbazole (1.93 g, 11.52 mmol) and sodium hydride (60% dispersion in mineral oil, 0.55 g, 23.04 mmol) were dissolved in 1,3-dimethyl-2-imidazolidinone (20 mL). The solution was stirred for 4 h at 80 °C under nitrogen atmosphere. 2,3,5,6-tetrafluoro-4-(indolo[3,2,1-jk]carbazol-2-yl)benzotrile (0.8 g, 1.92 mmol) was added to the solution, then the solid was precipitated. The obtained solid was filtered and washed with water three times and washed with methanol for remained 9H-carbazole. The crude product was purified by column chromatography using dichloromethane/hexane (2/3). (yield: 1.00 g, 51.55%)  $^1\text{H}$  NMR (300 MHz,  $\text{CD}_2\text{Cl}_2$ ):  $\delta$  (ppm) = 7.88 (d, 4H,  $J=7.4\text{Hz}$ ), 7.62 (d, 2H,  $J=8.0\text{Hz}$ ), 7.48 (dd, 8H,  $J=8.0\text{Hz}$ ,  $J=10.1\text{Hz}$ ), 7.38 (t, 2H,  $J=7.7\text{Hz}$ ), 7.332-7.186 (m, 20H), 7.14 (dd, 2H,  $J=6.6\text{Hz}$ ,  $J=7.6\text{Hz}$ ), 7.05 (t, 4H,  $J=7.8\text{Hz}$ ), 6.89 (t, 4H,  $J=7.5\text{Hz}$ )  $^{13}\text{C}$  NMR (500mHz,  $\text{CD}_2\text{Cl}_2$ )  $\delta$  150.139, 141.143, 139.978, 139.835, 139.471, 138.946, 138.897, 138.793, 131.138, 130.357, 129.980, 129.096, 128.963, 128.835, 127.799, 125.991, 125.632, 125.171, 125.114, 124.985, 123.886, 123.836, 123.556, 122.759, 121.062, 120.758, 120.631, 120.230, 119.880, 119.787, 119.668, 118.823, 117.797, 112.755, 110.562, 110.294, 110.162. HRMS (EI, m/z): calcd for  $\text{C}_{73}\text{H}_{42}\text{N}_6$  1002.3471, found 1003.3539.

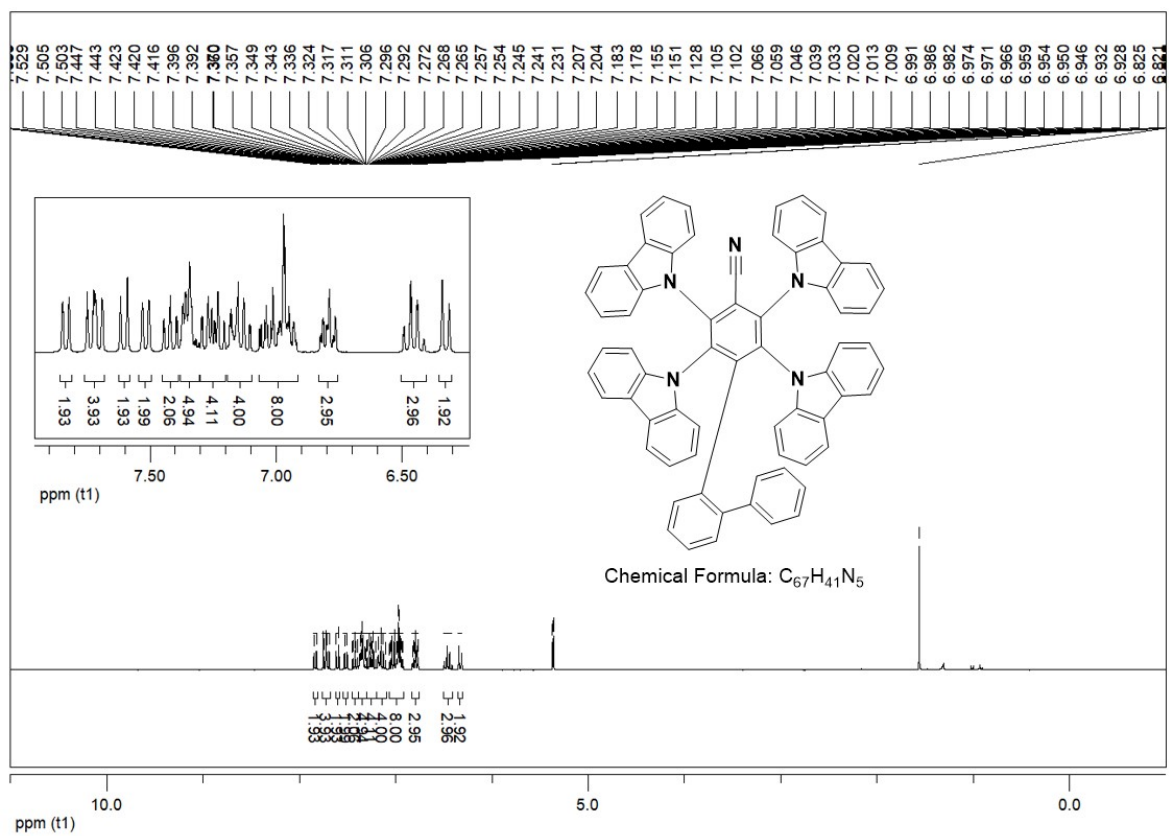

figure S1. <sup>1</sup>H-NMR spectra of 4CzBN-BP (1)

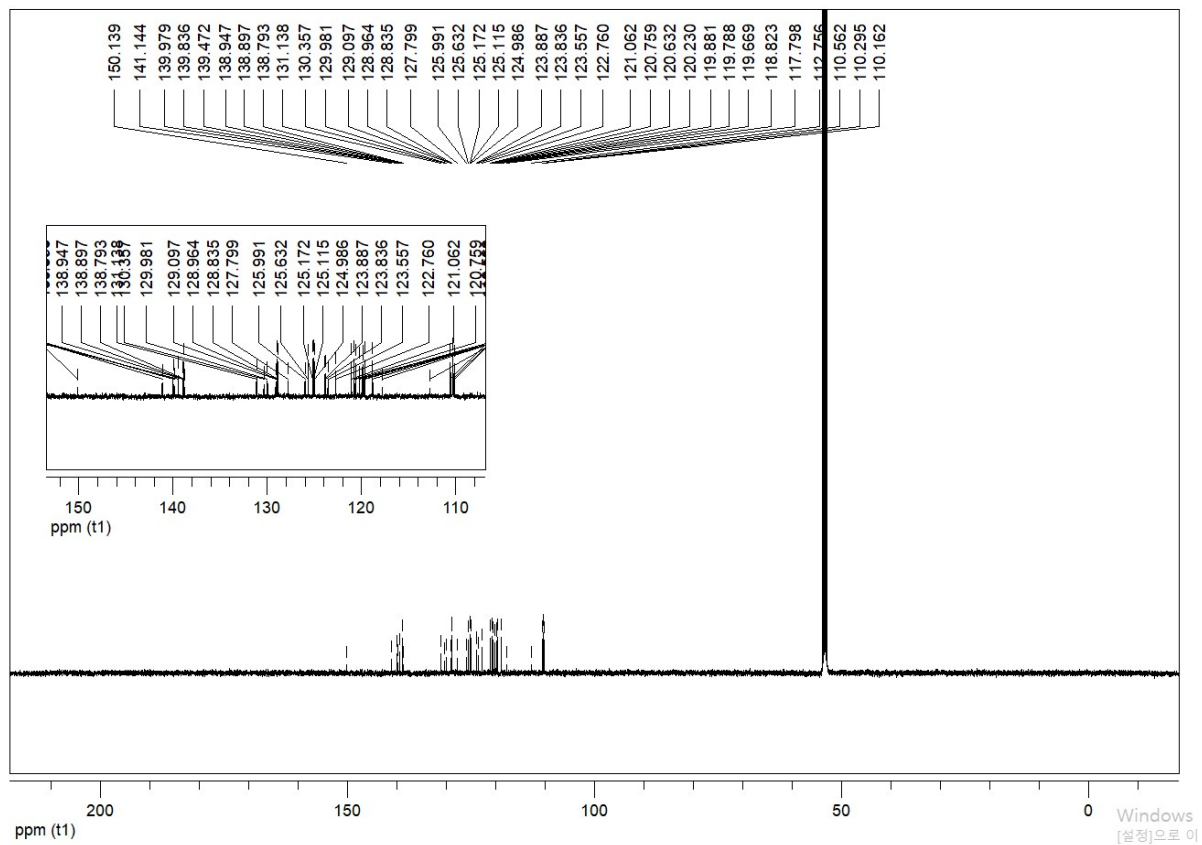

Figure S2.  $^{13}\text{C}$ -NMR spectra of 4CzBN-BP (1)

[Mass Spectrum]  
Data: FAB151 Date: 02 Dec 2019 14:29  
Instrument: MSStation  
Sample: 4CzBN-BP  
Note: m-NBA  
Inlet: Direct Ion Mode: FAB+  
Spectrum Type: Normal Ion [MF-Linear]  
RT: 0.00 min Scan#: 1133 Temp: 3276.7 deg.C  
BP: m/z 916 Int.: 126342 (13247814)  
Output m/z range: 10 to 1000 Cut Level: 0.00 %

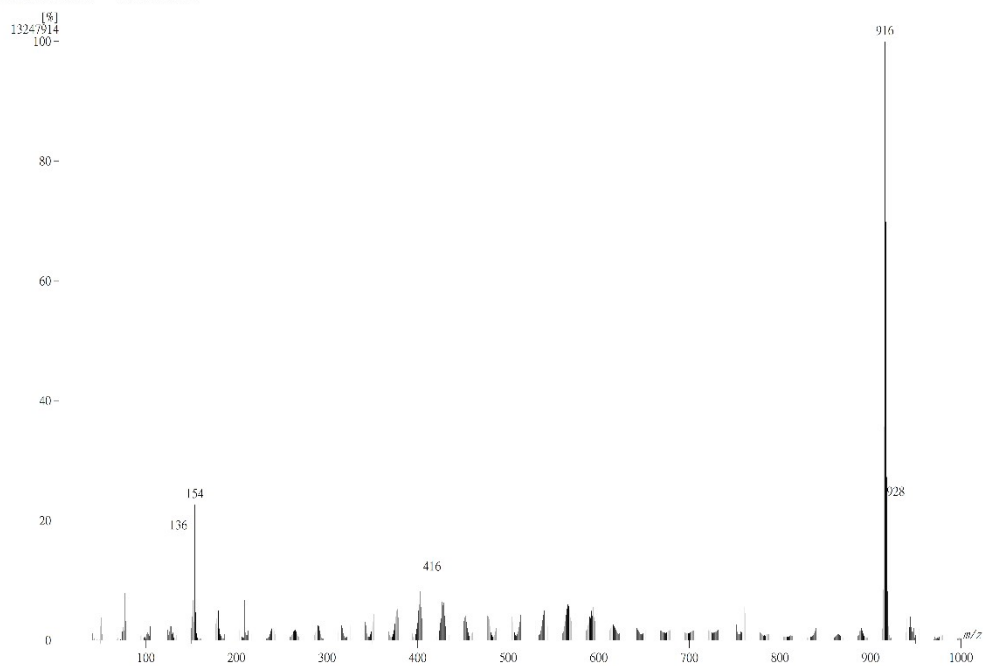

**Figure S3.** Mass spectrum of 4CzBN-BP (1)

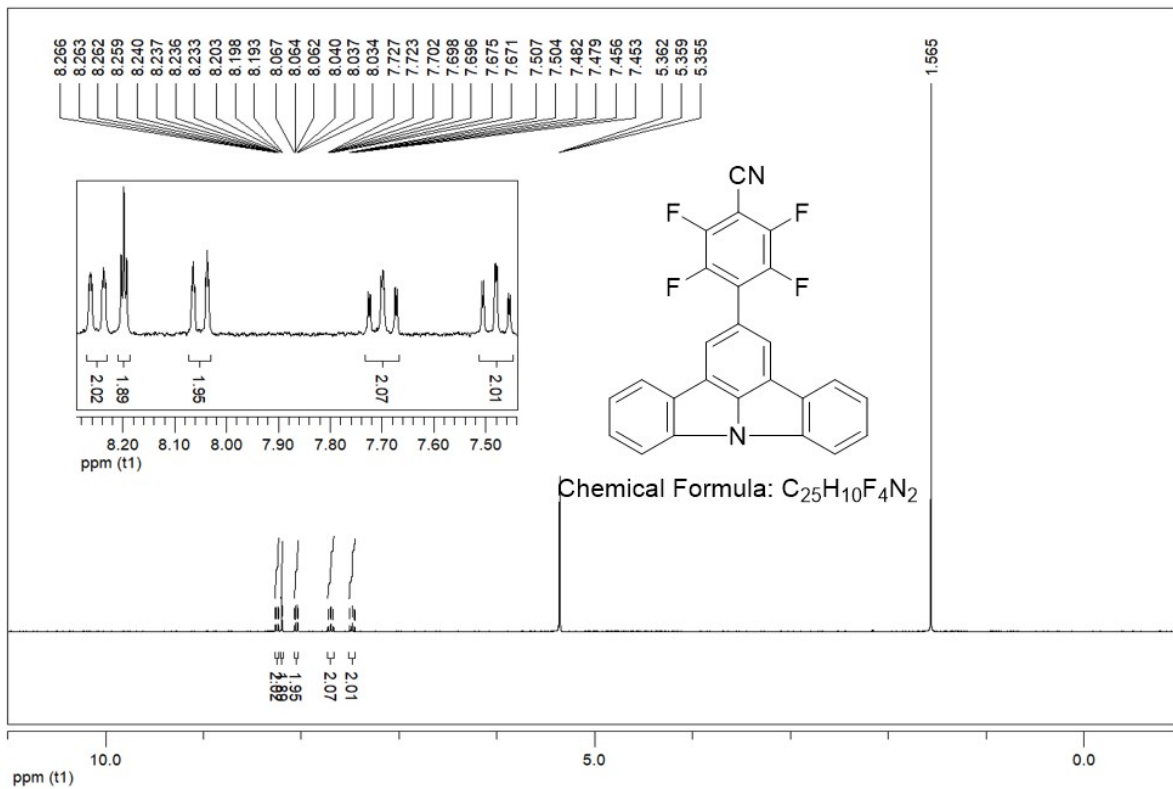

**Figure S4.**  $^1H$ -NMR spectra of 4FBN-ICz



[ Mass Spectrum ]  
Data : HYH-4FBN-ICz Date : 09-Jul-2019 17:05  
Inlet : Direct Ion Mode : EI+  
RT : 0.57 min Scan# : 18

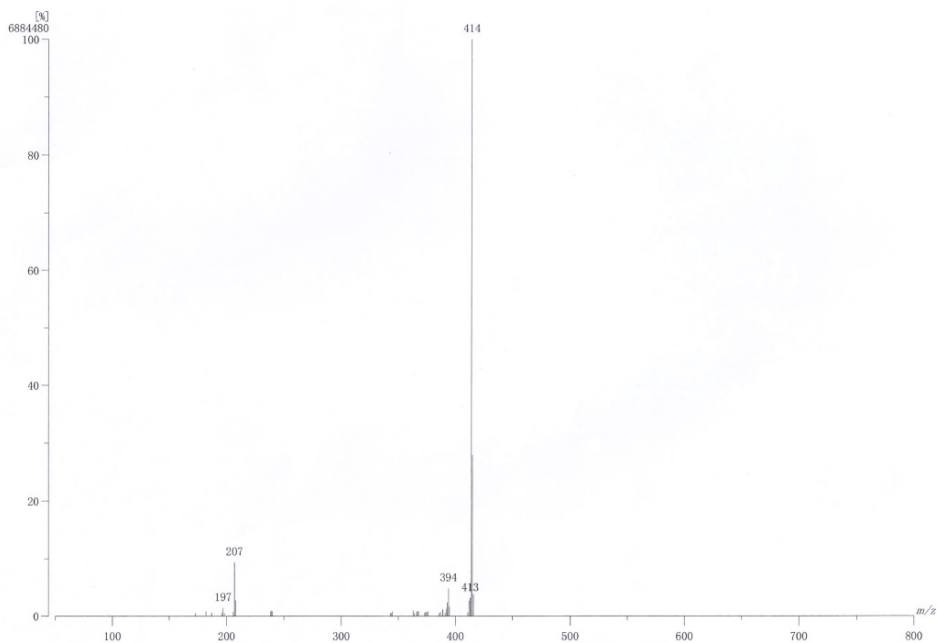

**Figure S5.** Mass spectrum of 4FBN-ICz

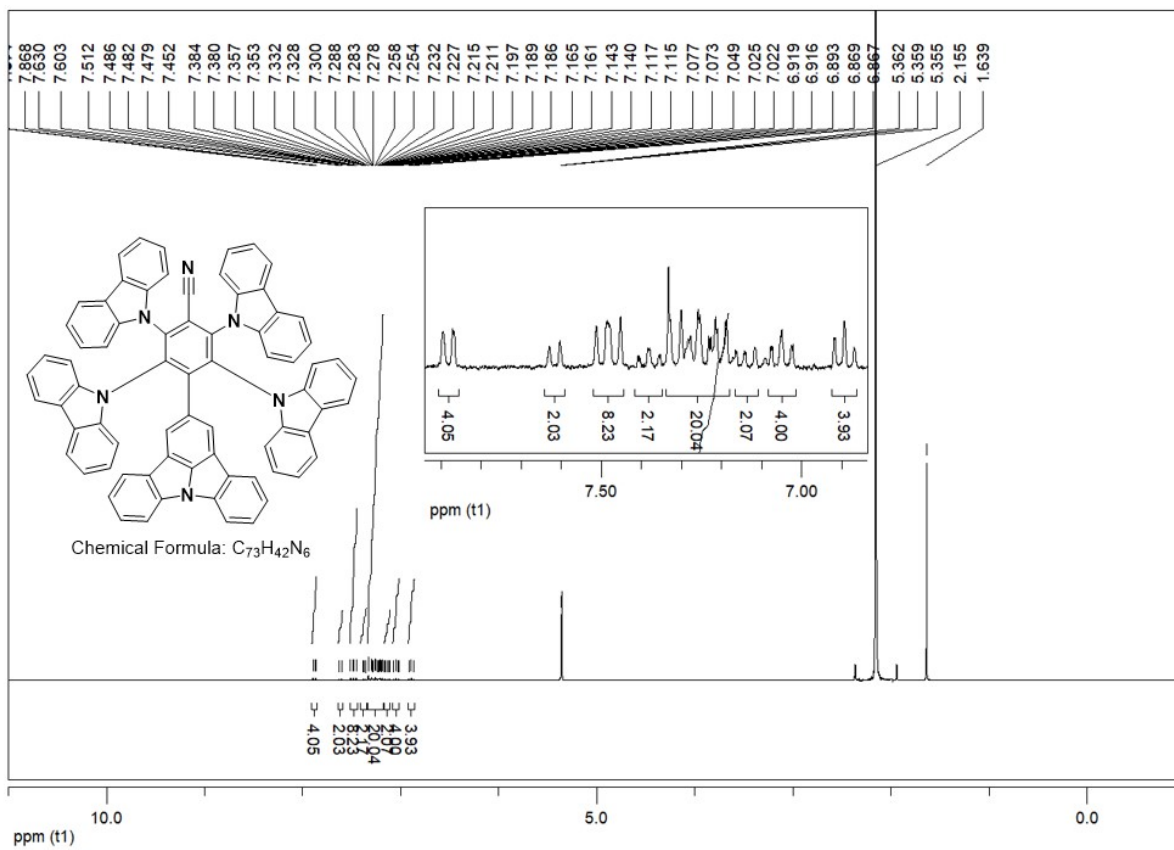

Figure S6.  $^1H$ -NMR spectra of 4CzBN-ICz (2)

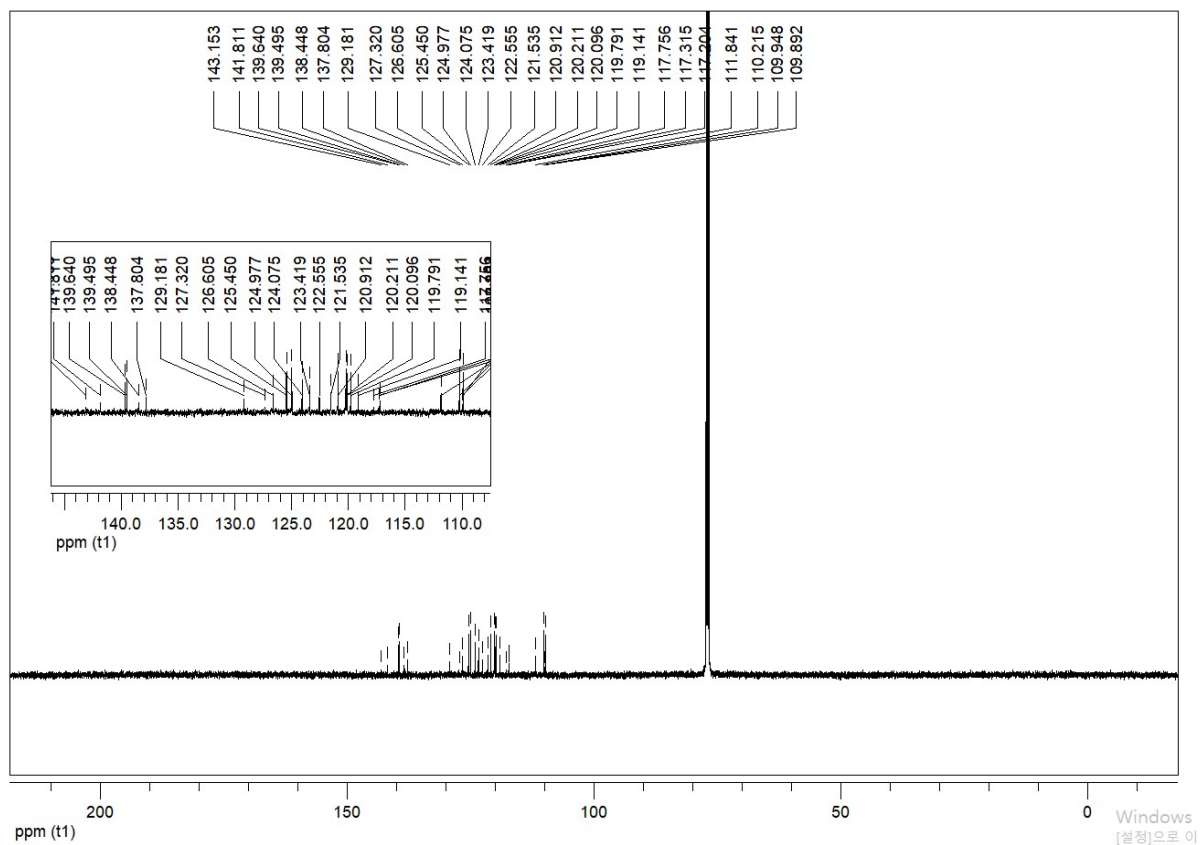

Figure S7.  $^{13}\text{C}$ -NMR spectra of 4CzBN-ICz (2)

[ Mass Spectrum ]  
Data : FAB152 Date : 02-Dec-2019 14:32  
Instrument : MStation  
Sample : 4CzBN-ICz  
Note : m-NBA  
Inlet : Direct Ion Mode : FAB+  
Spectrum Type : Normal Ion [MF-Linear]  
RT : 0.00 min Scan# : (1.7) Temp : 3276.7 deg.C  
BP : m/z 154 Int. : 603.97 (6333110)  
Output m/z range : 10 to 1100 Cut Level : 0.00 %

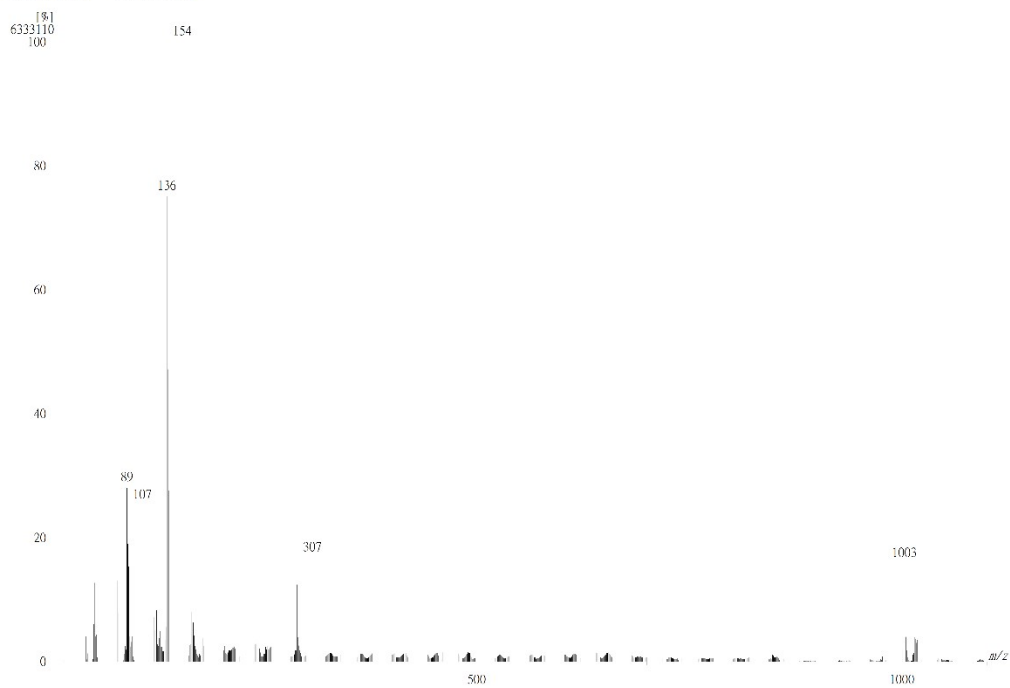

**Figure S8.** Mass spectrum of 4CzBN-ICz (2)

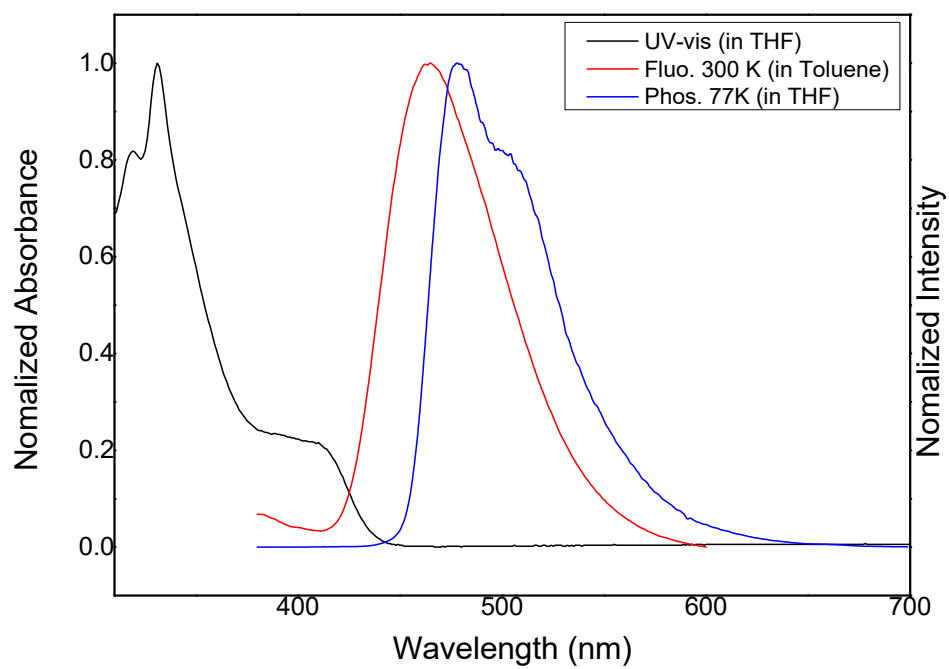

**Figure S9.** Absorption and photoluminescence spectra of 4CzBN-BP

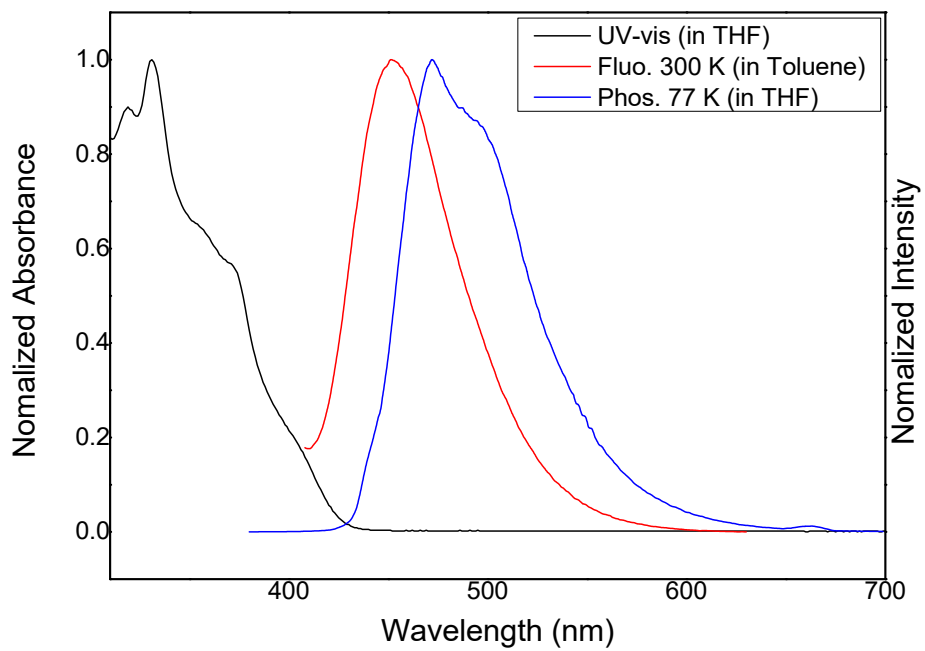

**Figure S10.** Absorption and photoluminescence spectra of 4CzBN-ICz

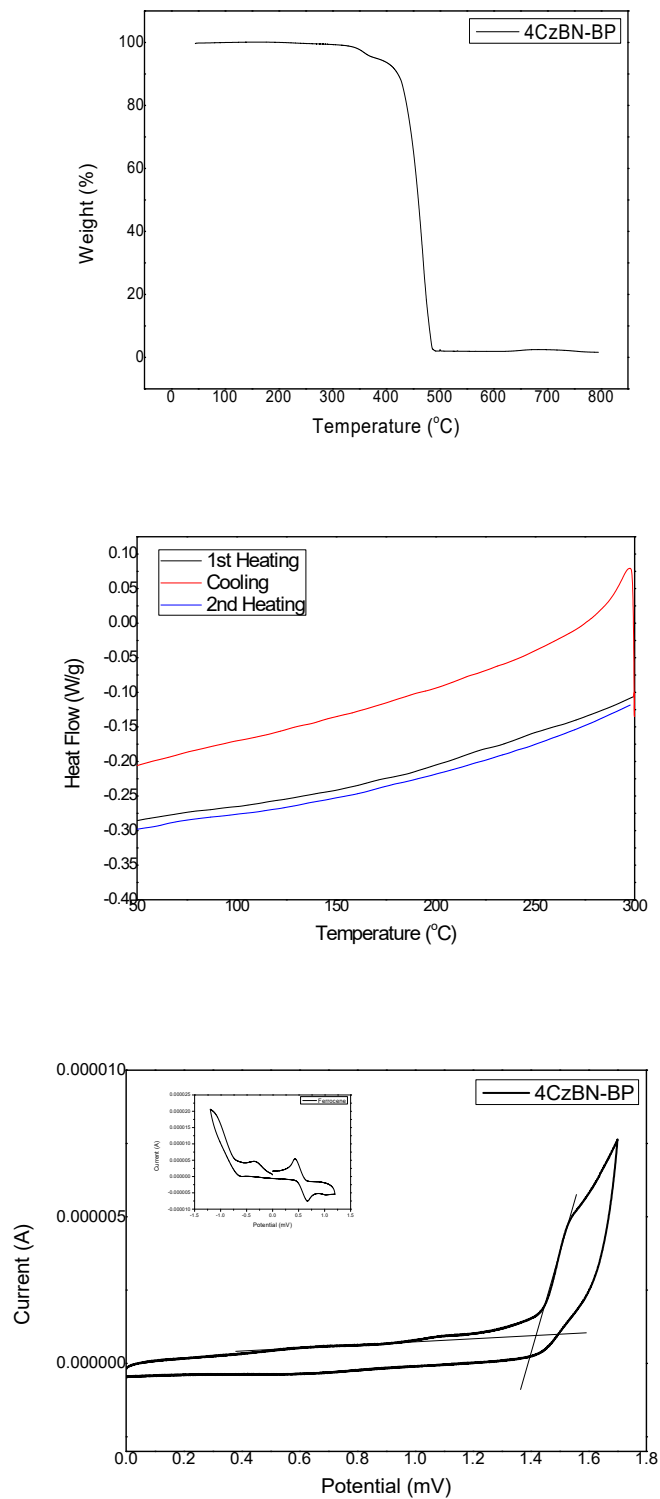

**Figure S11.** Thermogravimetric analysis (TGA), differential scanning calorimetry (DSC) and cyclic voltammetry (CV) results of 4CzBN-BP

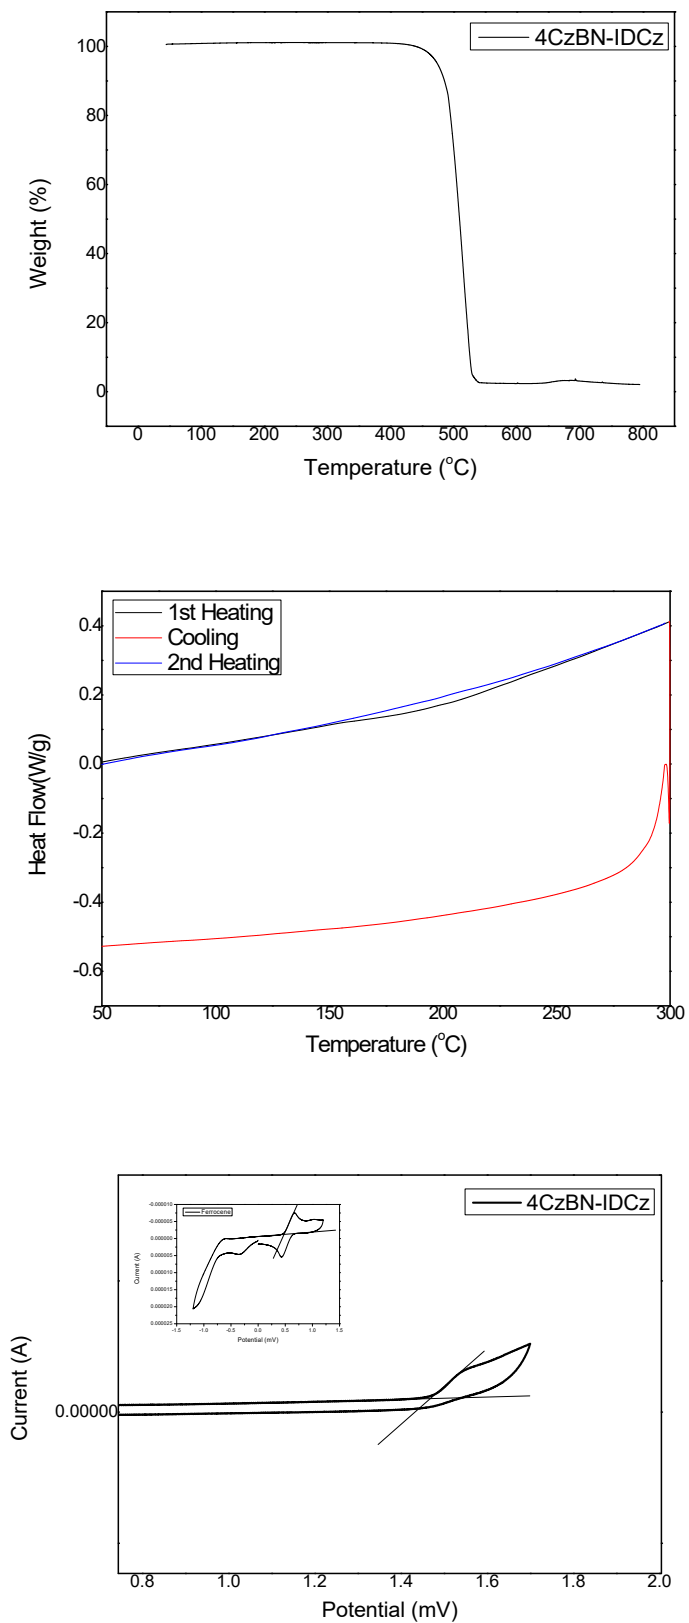

**Figure S12.** Thermogravimetric analysis (TGA), differential scanning calorimetry (DSC) and cyclic voltammetry (CV) results of 4CzBN-IDCz



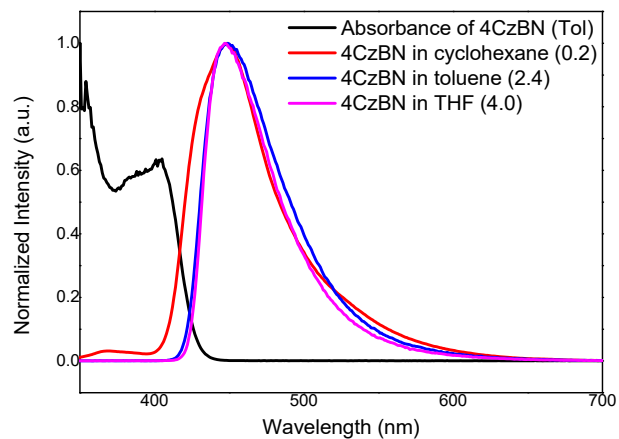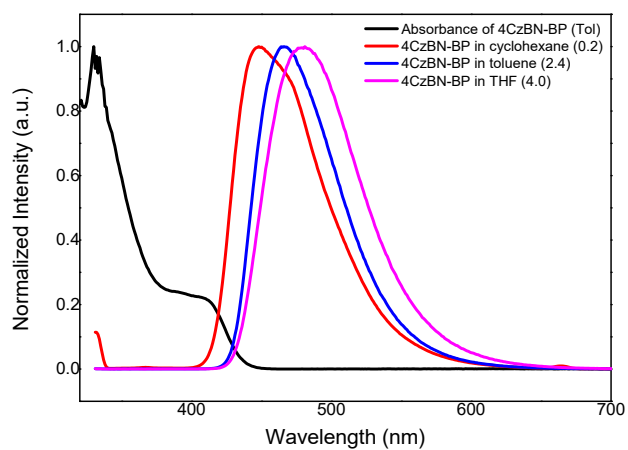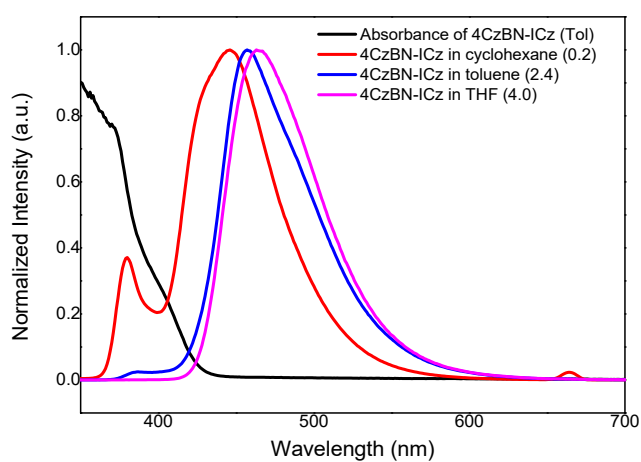

**Figure S13.** The solvatochromic characteristics of the 4CzBN, 4CzBN-BP, and 4CzBN-ICz in cyclohexane, toluene, and THF.

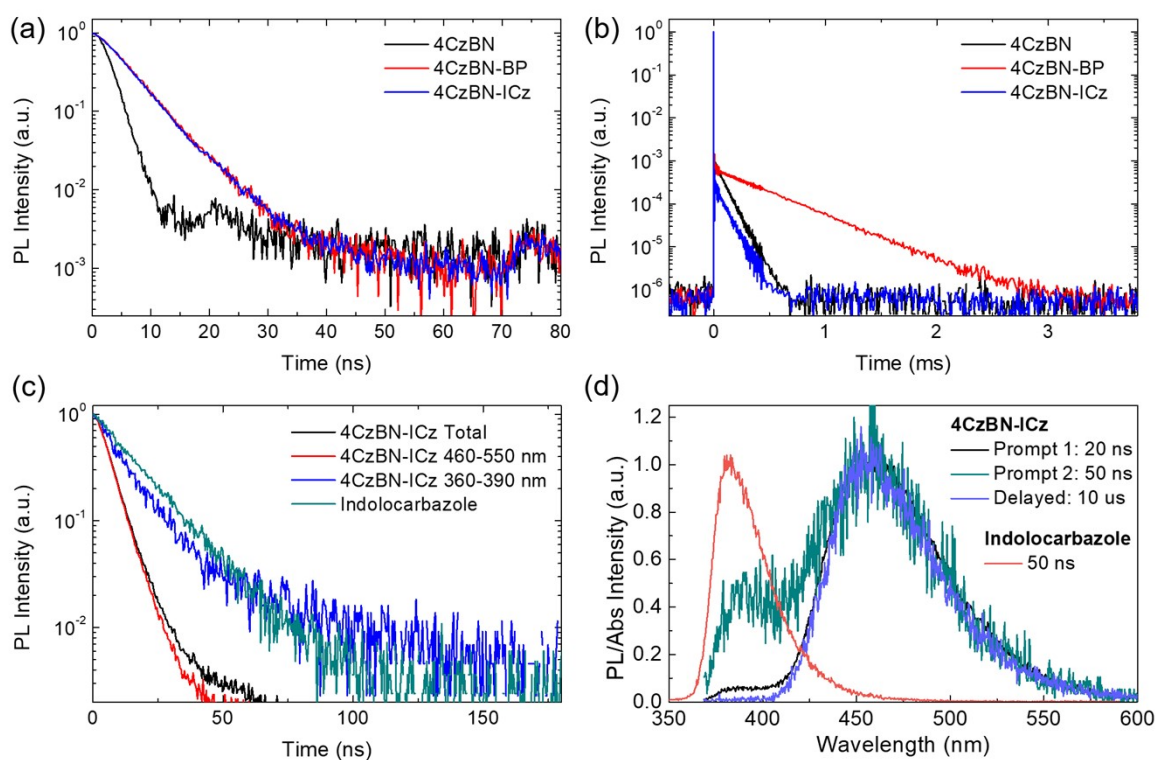

**Figure S14.** PL decay and time-resolved spectra of 4CzBN-ICz and indolocarbazole in toluene ( $10^{-5}$  M,  $N_2$  purged). Excitation: 337 nm pulsed laser. (a) Transient PL decay of prompt fluorescence. (b) Transient PL decay of total emission. (c) Wavelength dependent PL decay of 4CzBN-ICz and indolocarbazole. (d) Time-resolved spectra of 4CzBN-ICz and indolocarbazole.

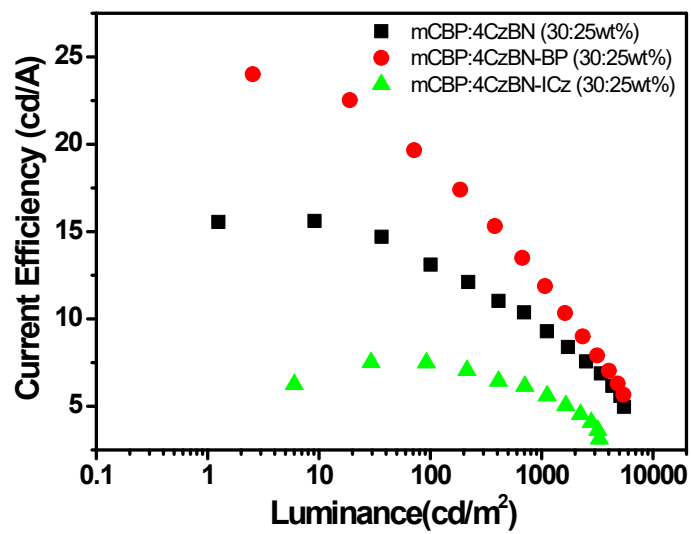

**Figure S15.** Current efficiency (CE) of the blue TADF OLEDs as the function of luminance.

**Table S1. Geometry Coordinates of Relaxed Geometries of TADF Molecules****4CzBN S<sub>0</sub>**

|     |          |  |         |           |
|-----|----------|--|---------|-----------|
| C1  | 1.00E-04 |  | 1.3823  | -1.00E-04 |
| C2  | -1.2261  |  | 0.7133  | 0.0152    |
| C3  | -1.2393  |  | -0.6989 | 0.01      |
| C4  | 0        |  | -1.3843 | 0         |
| C5  | 1.2393   |  | -0.6989 | -0.0101   |
| C6  | 1.2262   |  | 0.7132  | -0.0154   |
| C7  | 0        |  | -2.818  | 1.00E-04  |
| N8  | 0        |  | -3.9804 | 1.00E-04  |
| N9  | 2.4451   |  | -1.432  | -0.0122   |
| C10 | 2.9097   |  | -2.2599 | 1.0274    |
| C11 | 4.1581   |  | -2.8068 | 0.648     |
| C12 | 4.4566   |  | -2.3081 | -0.6794   |
| C13 | 3.3845   |  | -1.4658 | -1.0587   |
| N14 | 2.4106   |  | 1.485   | -0.0707   |
| C15 | 2.6971   |  | 2.4202  | -1.0799   |
| C16 | 3.8963   |  | 3.0968  | -0.75     |
| C17 | 4.3387   |  | 2.5746  | 0.5267    |
| C18 | 3.3978   |  | 1.5934  | 0.9248    |
| C19 | -3.8962  |  | 3.0967  | 0.7498    |
| C20 | -2.6969  |  | 2.4203  | 1.0797    |
| N21 | -2.4105  |  | 1.4851  | 0.0705    |
| C22 | -3.3978  |  | 1.5932  | -0.9249   |
| C23 | -4.3387  |  | 2.5744  | -0.5268   |
| C24 | -4.1582  |  | -2.8067 | -0.6478   |
| C25 | -4.4566  |  | -2.3078 | 0.6796    |
| C26 | -3.3844  |  | -1.4655 | 1.0588    |
| N27 | -2.445   |  | -1.4319 | 0.0122    |
| C28 | -2.9097  |  | -2.2599 | -1.0273   |
| C29 | 5.5147   |  | -2.5172 | -1.5706   |
| C30 | 5.485    |  | -1.895  | -2.8155   |
| C31 | 4.4054   |  | -1.0735 | -3.1787   |
| C32 | 3.3389   |  | -0.8507 | -2.3093   |
| C33 | 2.3334   |  | -2.5344 | 2.2685    |
| C34 | 3.0283   |  | -3.3791 | 3.1327    |
| C35 | 4.2666   |  | -3.9342 | 2.7721    |
| C36 | 4.836    |  | -3.6517 | 1.5335    |

|     |          |  |         |           |
|-----|----------|--|---------|-----------|
| C37 | 5.4189   |  | 2.8746  | 1.364     |
| C38 | 5.538    |  | 2.2091  | 2.5805    |
| C39 | 4.5831   |  | 1.255   | 2.9681    |
| C40 | 3.4995   |  | 0.9372  | 2.1513    |
| C41 | 2.0008   |  | 2.6944  | -2.2594   |
| C42 | 2.5238   |  | 3.6673  | -3.1105   |
| C43 | 3.7118   |  | 4.348   | -2.7989   |
| C44 | 4.4019   |  | 4.0662  | -1.6228   |
| C45 | -3.4996  |  | 0.937   | -2.1513   |
| C46 | -4.5834  |  | 1.2546  | -2.9681   |
| C47 | -5.5383  |  | 2.2086  | -2.5804   |
| C48 | -5.4192  |  | 2.8742  | -1.364    |
| C49 | -4.4019  |  | 4.0662  | 1.6227    |
| C50 | -3.7117  |  | 4.3481  | 2.7986    |
| C51 | -2.5235  |  | 3.6675  | 3.1101    |
| C52 | -2.0005  |  | 2.6946  | 2.259     |
| C53 | -5.5147  |  | -2.5168 | 1.5708    |
| C54 | -5.4849  |  | -1.8944 | 2.8157    |
| C55 | -4.4053  |  | -1.073  | 3.1787    |
| C56 | -3.3388  |  | -0.8504 | 2.3093    |
| C57 | -2.3334  |  | -2.5347 | -2.2683   |
| C58 | -3.0285  |  | -3.3794 | -3.1325   |
| C59 | -4.2668  |  | -3.9343 | -2.7717   |
| C60 | -4.8361  |  | -3.6516 | -1.5332   |
| H61 | 1.00E-04 |  | 2.4668  | -2.00E-04 |
| H62 | 6.3448   |  | -3.1622 | -1.2953   |
| H63 | 6.3008   |  | -2.0493 | -3.5158   |
| H64 | 4.3967   |  | -0.6    | -4.1564   |
| H65 | 2.509    |  | -0.2174 | -2.6031   |
| H66 | 1.3714   |  | -2.1202 | 2.5537    |
| H67 | 2.5961   |  | -3.615  | 4.1011    |
| H68 | 4.7822   |  | -4.5915 | 3.4662    |
| H69 | 5.7958   |  | -4.0797 | 1.2569    |
| H70 | 6.1496   |  | 3.6235  | 1.0702    |
| H71 | 6.3725   |  | 2.4318  | 3.2392    |
| H72 | 4.6872   |  | 0.7491  | 3.9239    |
| H73 | 2.7716   |  | 0.1986  | 2.4656    |
| H74 | 1.0805   |  | 2.176   | -2.51     |

|     |         |  |         |         |
|-----|---------|--|---------|---------|
| H75 | 1.9976  |  | 3.9008  | -4.0319 |
| H76 | 4.0939  |  | 5.1008  | -3.4822 |
| H77 | 5.3224  |  | 4.5923  | -1.3843 |
| H78 | -2.7716 |  | 0.1984  | -2.4657 |
| H79 | -4.6875 |  | 0.7487  | -3.9238 |
| H80 | -6.3728 |  | 2.4312  | -3.239  |
| H81 | -6.1498 |  | 3.6231  | -1.0701 |
| H82 | -5.3225 |  | 4.5921  | 1.3843  |
| H83 | -4.0937 |  | 5.1009  | 3.4819  |
| H84 | -1.9973 |  | 3.9011  | 4.0314  |
| H85 | -1.0801 |  | 2.1764  | 2.5096  |
| H86 | -6.3448 |  | -3.1618 | 1.2956  |
| H87 | -6.3008 |  | -2.0486 | 3.516   |
| H88 | -4.3965 |  | -0.5994 | 4.1563  |
| H89 | -2.5088 |  | -0.2171 | 2.603   |
| H90 | -1.3714 |  | -2.1205 | -2.5536 |
| H91 | -2.5963 |  | -3.6155 | -4.1008 |
| H92 | -4.7824 |  | -4.5917 | -3.4658 |
| H93 | -5.7959 |  | -4.0796 | -1.2566 |

#### 4CzBN-BP S<sub>0</sub>

|     |           |         |          |
|-----|-----------|---------|----------|
| C1  | 0.1208    | -1.0837 | 0.1278   |
| C2  | -1.1155   | -0.3878 | 0.1359   |
| C3  | -1.154    | 0.9925  | -0.1592  |
| C4  | 0.0551    | 1.6805  | -0.394   |
| C5  | 1.3022    | 1.0306  | -0.2671  |
| C6  | 1.3328    | -0.3549 | 9.00E-04 |
| C7  | 0.0225    | 3.0772  | -0.715   |
| N8  | -7.00E-04 | 4.2079  | -0.9842  |
| N9  | 2.4838    | 1.7981  | -0.3718  |
| C10 | 2.8931    | 2.7959  | 0.5344   |
| C11 | 4.1261    | 3.3299  | 0.0987   |
| C12 | 4.4685    | 2.6561  | -1.1369  |
| C13 | 3.4362    | 1.7279  | -1.4027  |
| N14 | 2.5893    | -0.9801 | 0.2503   |
| C15 | 3.3109    | -1.8915 | -0.541   |
| C16 | 4.4751    | -2.285  | 0.1616   |

|     |         |         |         |
|-----|---------|---------|---------|
| C17 | 4.4521  | -1.6086 | 1.4397  |
| C18 | 3.2783  | -0.8227 | 1.4653  |
| C19 | -3.8153 | -2.0446 | 1.9601  |
| C20 | -2.5063 | -1.5234 | 1.8567  |
| N21 | -2.2944 | -1.0656 | 0.5419  |
| C22 | -3.4882 | -1.2616 | -0.1802 |
| C23 | -4.4386 | -1.8789 | 0.665   |
| C24 | -4.0606 | 3.0351  | -1.0291 |
| C25 | -4.1938 | 2.9529  | 0.4109  |
| C26 | -3.1346 | 2.1429  | 0.8805  |
| N27 | -2.3708 | 1.7127  | -0.2191 |
| C28 | -2.9216 | 2.2781  | -1.3824 |
| C29 | 5.5292  | 2.7862  | -2.0409 |
| C30 | 5.5606  | 2.0128  | -3.2012 |
| C31 | 4.5016  | 1.1142  | -3.4481 |
| C32 | 3.4345  | 0.9628  | -2.5679 |
| C33 | 2.2769  | 3.2553  | 1.6993  |
| C34 | 2.9195  | 4.2539  | 2.4243  |
| C35 | 4.155   | 4.8032  | 2.0212  |
| C36 | 4.7505  | 4.3311  | 0.8522  |
| C37 | 5.2988  | -1.6263 | 2.5544  |
| C38 | 4.9801  | -0.8815 | 3.6899  |
| C39 | 3.7899  | -0.1243 | 3.6925  |
| C40 | 2.9304  | -0.0842 | 2.5981  |
| C41 | 3.0446  | -2.4034 | -1.8125 |
| C42 | 3.9536  | -3.3005 | -2.3648 |
| C43 | 5.1251  | -3.7035 | -1.6909 |
| C44 | 5.3745  | -3.1852 | -0.4217 |
| C45 | -3.7934 | -0.9725 | -1.5099 |
| C46 | -5.0668 | -1.29   | -1.9699 |
| C47 | -6.0405 | -1.8981 | -1.1495 |
| C48 | -5.71   | -2.1956 | 0.1714  |
| C49 | -4.2674 | -2.5493 | 3.1847  |
| C50 | -3.4361 | -2.5258 | 4.3047  |
| C51 | -2.1461 | -1.9706 | 4.1782  |
| C52 | -1.6677 | -1.4665 | 2.9715  |
| C53 | -5.0926 | 3.5119  | 1.3271  |
| C54 | -4.9367 | 3.2785  | 2.6932  |
| C55 | -3.8586 | 2.4791  | 3.1281  |

|     |         |         |         |
|-----|---------|---------|---------|
| C56 | -2.9496 | 1.9078  | 2.2425  |
| C57 | -2.5119 | 2.1593  | -2.7113 |
| C58 | -3.2619 | 2.8155  | -3.6825 |
| C59 | -4.4048 | 3.5796  | -3.3647 |
| C60 | -4.7966 | 3.6804  | -2.0299 |
| C61 | -2.0367 | -3.8365 | -2.5038 |
| C62 | -0.9697 | -3.0681 | -2.0006 |
| C63 | -0.512  | -2.0039 | -2.7978 |
| C64 | -1.0681 | -1.7427 | -4.0509 |
| C65 | -2.1094 | -2.532  | -4.5395 |
| C66 | -2.5964 | -3.5761 | -3.7525 |
| C67 | 0.7654  | -3.0986 | 1.4371  |
| C68 | 0.8755  | -4.4684 | 1.6523  |
| C69 | 0.3914  | -5.3486 | 0.6885  |
| C70 | -0.1951 | -4.8455 | -0.4676 |
| C71 | -0.3339 | -3.4647 | -0.7063 |
| C72 | 0.1682  | -2.5748 | 0.2803  |
| H73 | 6.3268  | 3.4986  | -1.8435 |
| H74 | 4.5169  | 0.5192  | -4.3583 |
| H75 | 2.6299  | 0.2713  | -2.7917 |
| H76 | 1.3192  | 2.8657  | 2.03    |
| H77 | 2.4478  | 4.6275  | 3.3302  |
| H78 | 5.7012  | 4.7448  | 0.5239  |
| H79 | 6.2052  | -2.2273 | 2.5383  |
| H80 | 3.535   | 0.4535  | 4.578   |
| H81 | 2.0273  | 0.5153  | 2.6308  |
| H82 | 2.156   | -2.1301 | -2.3664 |
| H83 | 3.7485  | -3.7061 | -3.3531 |
| H84 | 6.2703  | -3.4829 | 0.1189  |
| H85 | -3.0684 | -0.5233 | -2.1765 |
| H86 | -5.3166 | -1.0618 | -3.0034 |
| H87 | -6.4421 | -2.6697 | 0.8213  |
| H88 | -5.2751 | -2.9501 | 3.2672  |
| H89 | -1.5005 | -1.9328 | 5.0528  |
| H90 | -0.6739 | -1.0356 | 2.914   |
| H91 | -5.9099 | 4.1368  | 0.9745  |
| H92 | -3.732  | 2.3001  | 4.1934  |
| H93 | -2.1341 | 1.2949  | 2.61    |
| H94 | -1.6355 | 1.5803  | -2.9863 |



|      |         |         |         |
|------|---------|---------|---------|
| H95  | -2.9524 | 2.7397  | -4.7225 |
| H96  | -5.6748 | 4.2653  | -1.7666 |
| H97  | -2.4494 | -4.635  | -1.8954 |
| H98  | 0.2948  | -1.3731 | -2.4471 |
| H99  | -0.6758 | -0.9242 | -4.6492 |
| H100 | -2.5401 | -2.3307 | -5.5164 |
| H101 | -3.423  | -4.1866 | -4.1057 |
| H102 | 1.1534  | -2.4158 | 2.1846  |
| H103 | 1.3435  | -4.8376 | 2.56    |
| H104 | 0.4816  | -6.4228 | 0.8247  |
| H105 | -0.5288 | -5.5391 | -1.2325 |
| H106 | 4.6142  | 5.5747  | 2.6033  |
| H107 | 6.3691  | 2.0936  | -3.8974 |
| H108 | 5.8001  | -4.3949 | -2.1505 |
| H109 | 5.6229  | -0.8752 | 4.5453  |
| H110 | -3.7628 | -2.9204 | 5.2441  |
| H111 | -4.9518 | 4.0734  | -4.1405 |
| H112 | -5.617  | 3.6952  | 3.4062  |
| H113 | -7.0107 | -2.1214 | -1.5416 |

#### 4CzBN-ICz S<sub>0</sub>

|     |         |         |         |
|-----|---------|---------|---------|
| C1  | 0.0847  | -1.1312 | 0.0951  |
| C2  | -0.8449 | -0.3402 | 0.8189  |
| C3  | -0.9321 | 1.0483  | 0.5793  |
| C4  | -0.0397 | 1.6469  | -0.3348 |
| C5  | 0.9822  | 0.8965  | -0.9562 |
| C6  | 1.0455  | -0.4963 | -0.7354 |
| C7  | -0.1364 | 3.0525  | -0.5999 |
| N8  | -0.2189 | 4.1899  | -0.8256 |
| N9  | 1.937   | 1.5722  | -1.7485 |
| C10 | 2.8816  | 2.5025  | -1.2721 |
| C11 | 3.6654  | 2.9532  | -2.3573 |
| C12 | 3.1616  | 2.298   | -3.5469 |
| C13 | 2.0957  | 1.4633  | -3.1405 |
| N14 | 2.1472  | -1.2271 | -1.2684 |
| C15 | 2.1774  | -2.1659 | -2.3149 |
| C16 | 3.4918  | -2.6782 | -2.4319 |
| C17 | 4.2891  | -2.048  | -1.403  |

|     |         |         |         |
|-----|---------|---------|---------|
| C18 | 3.4325  | -1.17   | -0.7021 |
| C19 | -2.1021 | -1.7618 | 3.9426  |
| C20 | -1.0623 | -1.3237 | 3.0927  |
| N21 | -1.6103 | -0.9378 | 1.8539  |
| C22 | -3.0083 | -1.0932 | 1.9347  |
| C23 | -3.3387 | -1.6162 | 3.2058  |
| C24 | -3.5965 | 3.3581  | 1.5487  |
| C25 | -2.8623 | 3.2363  | 2.7915  |
| C26 | -1.8095 | 2.3202  | 2.5639  |
| N27 | -1.8848 | 1.8638  | 1.2359  |
| C28 | -2.9602 | 2.5172  | 0.609   |
| C29 | 3.4977  | 2.377   | -4.9033 |
| C30 | 2.7783  | 1.6447  | -5.8478 |
| C31 | 1.7041  | 0.8418  | -5.4111 |
| C32 | 1.347   | 0.743   | -4.0696 |
| C33 | 3.106   | 2.9671  | 0.0246  |
| C34 | 4.1329  | 3.8858  | 0.2174  |
| C35 | 4.9389  | 4.3507  | -0.8432 |
| C36 | 4.6944  | 3.8749  | -2.1309 |
| C37 | 5.6265  | -2.1734 | -1.0085 |
| C38 | 6.1089  | -1.4451 | 0.0787  |
| C39 | 5.2231  | -0.5931 | 0.7713  |
| C40 | 3.8895  | -0.445  | 0.4003  |
| C41 | 1.1668  | -2.6074 | -3.1712 |
| C42 | 1.4897  | -3.5553 | -4.1373 |
| C43 | 2.7919  | -4.0771 | -4.2812 |
| C44 | 3.7885  | -3.6273 | -3.4172 |
| C45 | -3.9973 | -0.8441 | 0.9837  |
| C46 | -5.3178 | -1.1047 | 1.3333  |
| C47 | -5.6812 | -1.6185 | 2.5961  |
| C48 | -4.6763 | -1.8782 | 3.5262  |
| C49 | -1.8045 | -2.1866 | 5.2426  |
| C50 | -0.489  | -2.1637 | 5.7057  |
| C51 | 0.5232  | -1.6917 | 4.8447  |
| C52 | 0.2576  | -1.2687 | 3.545   |
| C53 | -2.9918 | 3.8393  | 4.0478  |
| C54 | -2.0832 | 3.5439  | 5.0643  |
| C55 | -1.0343 | 2.6395  | 4.797   |
| C56 | -0.8794 | 2.022   | 3.559   |

|     |         |         |         |
|-----|---------|---------|---------|
| C57 | -3.4254 | 2.4107  | -0.7024 |
| C58 | -4.5394 | 3.1646  | -1.0589 |
| C59 | -5.1993 | 4.0139  | -0.1456 |
| C60 | -4.7179 | 4.1007  | 1.1606  |
| H61 | 4.3154  | 3.0185  | -5.2237 |
| H62 | 1.1322  | 0.2814  | -6.1469 |
| H63 | 0.5082  | 0.1262  | -3.7671 |
| H64 | 2.4949  | 2.6422  | 0.8609  |
| H65 | 4.3149  | 4.2628  | 1.2212  |
| H66 | 5.3036  | 4.224   | -2.9615 |
| H67 | 6.2907  | -2.8454 | -1.5472 |
| H68 | 5.5941  | -0.0267 | 1.6224  |
| H69 | 3.238   | 0.2256  | 0.9498  |
| H70 | 0.151   | -2.242  | -3.096  |
| H71 | 0.705   | -3.9064 | -4.8038 |
| H72 | 4.8002  | -4.0164 | -3.5074 |
| H73 | -3.7576 | -0.4677 | -0.0025 |
| H74 | -6.0969 | -0.9065 | 0.601   |
| H75 | -4.9317 | -2.2799 | 4.5043  |
| H76 | -2.6034 | -2.524  | 5.8991  |
| H77 | 1.5483  | -1.6549 | 5.2068  |
| H78 | 1.0597  | -0.9002 | 2.9146  |
| H79 | -3.7974 | 4.5468  | 4.2305  |
| H80 | -0.3196 | 2.4143  | 5.5853  |
| H81 | -0.0632 | 1.3291  | 3.3878  |
| H82 | -2.9369 | 1.7675  | -1.4282 |
| H83 | -4.9108 | 3.0993  | -2.0792 |
| H84 | -5.214  | 4.7504  | 1.8779  |
| C85 | 0.087   | -2.6061 | 0.218   |
| C86 | 1.1664  | -3.2087 | 0.8973  |
| C87 | -0.9902 | -3.3169 | -0.3517 |
| C88 | 1.1821  | -4.6054 | 1.0217  |
| H89 | 1.9555  | -2.5847 | 1.306   |
| C90 | -1.0001 | -4.7152 | -0.2422 |
| H91 | -1.7809 | -2.7718 | -0.8581 |
| C92 | 0.0925  | -5.2302 | 0.4375  |
| C93 | 1.9629  | -5.7232 | 1.5691  |
| C94 | -1.7747 | -5.9117 | -0.5959 |
| N95 | 0.0956  | -6.592  | 0.5513  |

|      |         |         |         |
|------|---------|---------|---------|
| C96  | 3.163   | -5.8054 | 2.276   |
| C97  | 1.2584  | -6.9386 | 1.2583  |
| C98  | -1.0651 | -7.0559 | -0.0877 |
| C99  | -2.9738 | -6.1138 | -1.2791 |
| C100 | 3.6475  | -7.0557 | 2.6617  |
| H101 | 3.7143  | -4.903  | 2.5234  |
| C102 | 1.7417  | -8.1846 | 1.6429  |
| C103 | -1.5436 | -8.3498 | -0.261  |
| C104 | -3.4533 | -7.4124 | -1.4526 |
| H105 | -3.5274 | -5.2661 | -1.6719 |
| C106 | 2.9455  | -8.2262 | 2.3487  |
| H107 | 4.581   | -7.1231 | 3.2118  |
| H108 | 1.2041  | -9.096  | 1.4045  |
| C109 | -2.7467 | -8.512  | -0.9502 |
| H110 | -1.0032 | -9.2076 | 0.1247  |
| H111 | -4.3861 | -7.5734 | -1.984  |
| H112 | 3.3422  | -9.188  | 2.6596  |
| H113 | -3.1393 | -9.5137 | -1.0975 |
| H114 | 3.0332  | 1.6827  | -6.8863 |
| H115 | 5.7146  | 5.0632  | -0.6547 |
| H116 | -6.0499 | 4.5817  | -0.4604 |
| H117 | -2.1781 | 3.9853  | 6.0343  |
| H118 | -6.71   | -1.801  | 2.8266  |
| H119 | -0.2441 | -2.494  | 6.6936  |
| H120 | 3.0003  | -4.8042 | -5.038  |
| H121 | 7.1306  | -1.5229 | 0.387   |

#### 4CzBN S<sub>1</sub>

|     |         |         |         |
|-----|---------|---------|---------|
| C1  | 0.0234  | 1.4978  | -0.033  |
| C2  | -1.1813 | 0.8206  | -0.0864 |
| C3  | -1.213  | -0.5645 | -0.1932 |
| C4  | 0.0064  | -1.3448 | -0.284  |
| C5  | 1.2465  | -0.6182 | -0.1576 |
| C6  | 1.2475  | 0.7539  | -0.0364 |
| C7  | -0.0422 | -2.7224 | -0.5106 |
| N8  | -0.1653 | -3.8712 | -0.6988 |
| N9  | 2.4493  | -1.3639 | -0.1792 |
| C10 | 2.8254  | -2.3246 | 0.7599  |

|     |         |         |         |
|-----|---------|---------|---------|
| C11 | 4.0574  | -2.8869 | 0.3763  |
| C12 | 4.4353  | -2.2541 | -0.8698 |
| C13 | 3.4199  | -1.3295 | -1.1814 |
| N14 | 2.4505  | 1.4973  | 0.0697  |
| C15 | 2.8315  | 2.5069  | -0.8126 |
| C16 | 4.0163  | 3.1088  | -0.3451 |
| C17 | 4.3559  | 2.4476  | 0.8966  |
| C18 | 3.3652  | 1.4716  | 1.1227  |
| C19 | -4.0937 | 2.8031  | 0.9018  |
| C20 | -2.8388 | 2.2147  | 1.1616  |
| N21 | -2.4052 | 1.5448  | 0.0222  |
| C22 | -3.3396 | 1.7494  | -0.9893 |
| C23 | -4.4131 | 2.5072  | -0.4793 |
| C24 | -4.2023 | -2.6012 | -0.7117 |
| C25 | -4.3009 | -2.3176 | 0.7184  |
| C26 | -3.1865 | -1.5159 | 1.0383  |
| N27 | -2.4455 | -1.2753 | -0.1201 |
| C28 | -3.0319 | -1.9396 | -1.1642 |
| C29 | 5.52    | -2.4027 | -1.7318 |
| C30 | 5.5729  | -1.6378 | -2.8862 |
| C31 | 4.5498  | -0.7304 | -3.1848 |
| C32 | 3.4617  | -0.564  | -2.3419 |
| C33 | 2.1757  | -2.7184 | 1.9268  |
| C34 | 2.7855  | -3.6871 | 2.7092  |
| C35 | 4.0123  | -4.2533 | 2.3443  |
| C36 | 4.6511  | -3.8581 | 1.1795  |
| C37 | 5.3836  | 2.6165  | 1.8229  |
| C38 | 5.4036  | 1.8233  | 2.9585  |
| C39 | 4.4021  | 0.8693  | 3.1758  |
| C40 | 3.3713  | 0.6819  | 2.2683  |
| C41 | 2.2239  | 2.9185  | -1.9974 |
| C42 | 2.8255  | 3.9466  | -2.708  |
| C43 | 4.0041  | 4.553   | -2.258  |
| C44 | 4.6029  | 4.1378  | -1.0787 |
| C45 | -3.294  | 1.3541  | -2.3231 |
| C46 | -4.3649 | 1.6985  | -3.135  |
| C47 | -5.4522 | 2.4265  | -2.6379 |
| C48 | -5.4784 | 2.8388  | -1.3145 |
| C49 | -4.7421 | 3.512   | 1.9112  |

|     |         |         |         |
|-----|---------|---------|---------|
| C50 | -4.1337 | 3.6281  | 3.1514  |
| C51 | -2.8809 | 3.0487  | 3.3886  |
| C52 | -2.2152 | 2.3364  | 2.4026  |
| C53 | -5.1854 | -2.6781 | 1.7115  |
| C54 | -4.9402 | -2.2352 | 3.0205  |
| C55 | -3.8306 | -1.4549 | 3.3211  |
| C56 | -2.9251 | -1.0801 | 2.3281  |
| C57 | -2.5869 | -2.0205 | -2.4882 |
| C58 | -3.3525 | -2.771  | -3.3685 |
| C59 | -4.5124 | -3.413  | -2.9373 |
| C60 | -4.9475 | -3.3354 | -1.6029 |
| H61 | 0.0458  | 2.5748  | 0.048   |
| H62 | 6.3096  | -3.1113 | -1.5022 |
| H63 | 6.4123  | -1.7419 | -3.5655 |
| H64 | 4.6084  | -0.1394 | -4.0931 |
| H65 | 2.6766  | 0.1437  | -2.577  |
| H66 | 1.2177  | -2.294  | 2.204   |
| H67 | 2.2964  | -4.0161 | 3.6204  |
| H68 | 4.4627  | -5.0102 | 2.9775  |
| H69 | 5.6022  | -4.2978 | 0.8956  |
| H70 | 6.1538  | 3.3634  | 1.6571  |
| H71 | 6.1988  | 1.9413  | 3.6869  |
| H72 | 4.4326  | 0.2572  | 4.0713  |
| H73 | 2.6051  | -0.0622 | 2.4426  |
| H74 | 1.3076  | 2.4563  | -2.346  |
| H75 | 2.37    | 4.287   | -3.6325 |
| H76 | 4.4498  | 5.3541  | -2.8377 |
| H77 | 5.5177  | 4.607   | -0.7303 |
| H78 | -2.4393 | 0.818   | -2.7168 |
| H79 | -4.3527 | 1.4048  | -4.1796 |
| H80 | -6.2732 | 2.6813  | -3.2993 |
| H81 | -6.3122 | 3.4215  | -0.9356 |
| H82 | -5.7082 | 3.9712  | 1.7265  |
| H83 | -4.6255 | 4.1818  | 3.9439  |
| H84 | -2.4141 | 3.1676  | 4.361   |
| H85 | -1.231  | 1.9164  | 2.5758  |
| H86 | -6.0511 | -3.2949 | 1.4957  |
| H87 | -5.629  | -2.5118 | 3.8107  |
| H88 | -3.6627 | -1.1294 | 4.341   |

|     |         |         |         |
|-----|---------|---------|---------|
| H89 | -2.0563 | -0.4762 | 2.5495  |
| H90 | -1.6684 | -1.5382 | -2.7928 |
| H91 | -3.0386 | -2.8688 | -4.4006 |
| H92 | -5.0906 | -3.9956 | -3.6457 |
| H93 | -5.8477 | -3.8539 | -1.2921 |

#### 4CzBN-BP S<sub>1</sub>

|     |         |         |         |
|-----|---------|---------|---------|
| C1  | 0.1431  | -1.1506 | 0.1881  |
| C2  | -1.0772 | -0.4753 | 0.0525  |
| C3  | -1.137  | 0.8096  | -0.4647 |
| C4  | 0.047   | 1.5049  | -0.9165 |
| C5  | 1.3004  | 0.8967  | -0.5625 |
| C6  | 1.3493  | -0.3723 | -0.0283 |
| C7  | -0.0352 | 2.7267  | -1.591  |
| N8  | -0.1813 | 3.7453  | -2.1466 |
| N9  | 2.47    | 1.6777  | -0.7361 |
| C10 | 2.7683  | 2.8423  | -0.0286 |
| C11 | 3.9844  | 3.3689  | -0.4958 |
| C12 | 4.4308  | 2.5023  | -1.5641 |
| C13 | 3.4688  | 1.4846  | -1.6895 |
| N14 | 2.5971  | -0.8916 | 0.4267  |
| C15 | 3.3759  | -1.9011 | -0.1391 |
| C16 | 4.485   | -2.151  | 0.6899  |
| C17 | 4.3625  | -1.2709 | 1.8295  |
| C18 | 3.1883  | -0.523  | 1.6334  |
| C19 | -3.8589 | -1.6217 | 2.1191  |
| C20 | -2.5213 | -1.2283 | 1.9279  |
| N21 | -2.2779 | -1.0587 | 0.5668  |
| C22 | -3.4598 | -1.3485 | -0.12   |
| C23 | -4.4595 | -1.6983 | 0.8057  |
| C24 | -4.1568 | 2.7459  | -1.1515 |
| C25 | -4.0445 | 2.9098  | 0.2968  |
| C26 | -2.9069 | 2.1783  | 0.6879  |
| N27 | -2.3524 | 1.5568  | -0.4303 |
| C28 | -3.0795 | 1.9114  | -1.536  |
| C29 | 5.531   | 2.5241  | -2.4205 |
| C30 | 5.6688  | 1.5508  | -3.3997 |
| C31 | 4.6803  | 0.5574  | -3.5129 |

|     |         |         |         |
|-----|---------|---------|---------|
| C32 | 3.5804  | 0.5092  | -2.6749 |
| C33 | 2.0552  | 3.4715  | 0.9885  |
| C34 | 2.5905  | 4.6235  | 1.5368  |
| C35 | 3.812   | 5.1661  | 1.1005  |
| C36 | 4.5012  | 4.5297  | 0.0779  |
| C37 | 5.123   | -1.0772 | 2.9826  |
| C38 | 4.7158  | -0.1572 | 3.9382  |
| C39 | 3.5289  | 0.5648  | 3.722   |
| C40 | 2.7567  | 0.3972  | 2.5853  |
| C41 | 3.1906  | -2.6292 | -1.3123 |
| C42 | 4.1342  | -3.5854 | -1.6424 |
| C43 | 5.26    | -3.8435 | -0.8407 |
| C44 | 5.4232  | -3.1187 | 0.3296  |
| C45 | -3.7138 | -1.3706 | -1.4878 |
| C46 | -4.9909 | -1.7089 | -1.9038 |
| C47 | -6.0164 | -2.0391 | -1.002  |
| C48 | -5.7352 | -2.0393 | 0.3573  |
| C49 | -4.3413 | -1.8389 | 3.4084  |
| C50 | -3.5057 | -1.6596 | 4.5025  |
| C51 | -2.1777 | -1.2519 | 4.283   |
| C52 | -1.669  | -1.0327 | 3.0149  |
| C53 | -4.7643 | 3.6089  | 1.2405  |
| C54 | -4.3504 | 3.5875  | 2.5852  |
| C55 | -3.2081 | 2.8665  | 2.9378  |
| C56 | -2.466  | 2.1522  | 2.0022  |
| C57 | -2.8532 | 1.5608  | -2.8707 |
| C58 | -3.7339 | 2.0583  | -3.8143 |
| C59 | -4.8091 | 2.8857  | -3.4616 |
| C60 | -5.017  | 3.2251  | -2.1097 |
| C61 | -1.906  | -4.149  | -2.1586 |
| C62 | -0.8544 | -3.3438 | -1.7055 |
| C63 | -0.3637 | -2.3705 | -2.5849 |
| C64 | -0.8853 | -2.2276 | -3.8653 |
| C65 | -1.9196 | -3.0487 | -4.3015 |
| C66 | -2.43   | -4.0084 | -3.437  |
| C67 | 0.8067  | -2.992  | 1.7218  |
| C68 | 0.9317  | -4.3236 | 2.0825  |
| C69 | 0.4601  | -5.3081 | 1.2263  |
| C70 | -0.121  | -4.9425 | 0.0232  |



|      |         |         |         |
|------|---------|---------|---------|
| C71  | -0.257  | -3.6026 | -0.3614 |
| C72  | 0.2168  | -2.5994 | 0.5154  |
| H73  | 6.2778  | 3.3077  | -2.3267 |
| H74  | 4.7843  | -0.2006 | -4.2842 |
| H75  | 2.8325  | -0.2657 | -2.7838 |
| H76  | 1.1012  | 3.0837  | 1.3269  |
| H77  | 2.0452  | 5.1307  | 2.3279  |
| H78  | 5.4424  | 4.9397  | -0.2776 |
| H79  | 6.0332  | -1.6503 | 3.1363  |
| H80  | 3.2113  | 1.2857  | 4.4702  |
| H81  | 1.8562  | 0.9795  | 2.4323  |
| H82  | 2.3304  | -2.4696 | -1.9491 |
| H83  | 3.9979  | -4.1612 | -2.5537 |
| H84  | 6.2821  | -3.3064 | 0.9682  |
| H85  | -2.9308 | -1.1727 | -2.2077 |
| H86  | -5.1996 | -1.736  | -2.9696 |
| H87  | -6.5085 | -2.3103 | 1.0706  |
| H88  | -5.3722 | -2.1465 | 3.5601  |
| H89  | -1.5252 | -1.1111 | 5.1402  |
| H90  | -0.6389 | -0.7308 | 2.8702  |
| H91  | -5.6411 | 4.1835  | 0.9584  |
| H92  | -2.8888 | 2.8612  | 3.9747  |
| H93  | -1.5816 | 1.599   | 2.2862  |
| H94  | -2.0154 | 0.9338  | -3.1445 |
| H95  | -3.5859 | 1.8107  | -4.8597 |
| H96  | -5.8507 | 3.866   | -1.8417 |
| H97  | -2.3347 | -4.8861 | -1.4887 |
| H98  | 0.4367  | -1.7146 | -2.2698 |
| H99  | -0.4657 | -1.4779 | -4.5295 |
| H100 | -2.321  | -2.9414 | -5.3041 |
| H101 | -3.248  | -4.648  | -3.7528 |
| H102 | 1.1808  | -2.2252 | 2.3907  |
| H103 | 1.4003  | -4.5871 | 3.0248  |
| H104 | 0.5579  | -6.3578 | 1.483   |
| H105 | -0.4472 | -5.7176 | -0.6614 |
| H106 | 4.1923  | 6.0588  | 1.5514  |
| H107 | 6.5093  | 1.5475  | -4.0619 |
| H108 | 5.9695  | -4.5876 | -1.1372 |
| H109 | 5.291   | 0.0118  | 4.8245  |

|      |         |         |         |
|------|---------|---------|---------|
| H110 | -6.9898 | -2.2939 | -1.3659 |
| H111 | -3.8542 | -1.8338 | 5.4991  |
| H112 | -4.9124 | 4.1093  | 3.3314  |
| H113 | -5.4556 | 3.2758  | -4.2197 |

#### **4CzBN-ICz S<sub>1</sub>**

|     |         |         |         |
|-----|---------|---------|---------|
| C1  | 0.1272  | -1.1934 | 0.1746  |
| C2  | -0.8733 | -0.3538 | 0.6801  |
| C3  | -1.0449 | 0.9317  | 0.1894  |
| C4  | -0.2287 | 1.4603  | -0.8843 |
| C5  | 0.9266  | 0.6771  | -1.2279 |
| C6  | 1.103   | -0.5903 | -0.7188 |
| C7  | -0.5001 | 2.7057  | -1.456  |
| N8  | -0.7786 | 3.7533  | -1.8961 |
| N9  | 1.8946  | 1.2881  | -2.0641 |
| C10 | 2.6967  | 2.3737  | -1.7085 |
| C11 | 3.5099  | 2.7257  | -2.7993 |
| C12 | 3.1646  | 1.831   | -3.8825 |
| C13 | 2.1633  | 0.9715  | -3.396  |
| N14 | 2.3284  | -1.2766 | -0.9658 |
| C15 | 2.5574  | -2.4026 | -1.7582 |
| C16 | 3.9065  | -2.7857 | -1.6399 |
| C17 | 4.5242  | -1.8651 | -0.7122 |
| C18 | 3.5218  | -0.9626 | -0.3166 |
| C19 | -2.1187 | -1.0756 | 4.034   |
| C20 | -1.089  | -0.867  | 3.0981  |
| N21 | -1.6377 | -0.7551 | 1.8212  |
| C22 | -3.023  | -0.8997 | 1.9366  |
| C23 | -3.3577 | -1.0956 | 3.2889  |
| C24 | -3.6583 | 3.3211  | 1.0771  |
| C25 | -2.7735 | 3.4375  | 2.2371  |
| C26 | -1.7203 | 2.5285  | 2.0182  |
| N27 | -1.9368 | 1.851   | 0.8207  |
| C28 | -3.0794 | 2.3359  | 0.2409  |
| C29 | 3.598   | 1.7122  | -5.2036 |
| C30 | 3.0353  | 0.7568  | -6.0372 |
| C31 | 2.0218  | -0.0739 | -5.5279 |
| C32 | 1.5744  | 0.0192  | -4.2213 |

|     |         |         |         |
|-----|---------|---------|---------|
| C33 | 2.7667  | 3.0734  | -0.5065 |
| C34 | 3.6722  | 4.1161  | -0.4151 |
| C35 | 4.5074  | 4.4834  | -1.4848 |
| C36 | 4.4156  | 3.78    | -2.6769 |
| C37 | 5.8086  | -1.7528 | -0.1797 |
| C38 | 6.0936  | -0.7586 | 0.7462  |
| C39 | 5.0666  | 0.1189  | 1.1361  |
| C40 | 3.7839  | 0.0333  | 0.6214  |
| C41 | 1.6856  | -3.131  | -2.565  |
| C42 | 2.188   | -4.2209 | -3.2536 |
| C43 | 3.5349  | -4.6143 | -3.1659 |
| C44 | 4.3873  | -3.8863 | -2.3499 |
| C45 | -4.0071 | -0.9059 | 0.952   |
| C46 | -5.3232 | -1.07   | 1.3498  |
| C47 | -5.6897 | -1.2445 | 2.6959  |
| C48 | -4.6922 | -1.2652 | 3.66    |
| C49 | -1.812  | -1.1964 | 5.3893  |
| C50 | -0.4944 | -1.101  | 5.8154  |
| C51 | 0.513   | -0.8734 | 4.8598  |
| C52 | 0.2402  | -0.754  | 3.5081  |
| C53 | -2.7769 | 4.2189  | 3.3709  |
| C54 | -1.7238 | 4.1002  | 4.2987  |
| C55 | -0.6891 | 3.1956  | 4.0485  |
| C56 | -0.664  | 2.3979  | 2.9094  |
| C57 | -3.6384 | 1.9856  | -0.993  |
| C58 | -4.8002 | 2.6354  | -1.3682 |
| C59 | -5.4001 | 3.6089  | -0.5562 |
| C60 | -4.815  | 3.9479  | 0.6823  |
| H61 | 4.3728  | 2.3725  | -5.5837 |
| H62 | 1.5751  | -0.8172 | -6.1828 |
| H63 | 0.7906  | -0.6313 | -3.8547 |
| H64 | 2.1191  | 2.8222  | 0.3258  |
| H65 | 3.7367  | 4.6757  | 0.5144  |
| H66 | 5.0489  | 4.0539  | -3.5162 |
| H67 | 6.587   | -2.4464 | -0.4859 |
| H68 | 5.2898  | 0.8964  | 1.8614  |
| H69 | 3.0139  | 0.7317  | 0.9258  |
| H70 | 0.6396  | -2.8702 | -2.6509 |
| H71 | 1.5144  | -4.7959 | -3.8835 |

|      |         |         |         |
|------|---------|---------|---------|
| H72  | 5.4311  | -4.1749 | -2.2611 |
| H73  | -3.7507 | -0.8297 | -0.0961 |
| H74  | -6.0988 | -1.0837 | 0.589   |
| H75  | -4.9504 | -1.4178 | 4.7044  |
| H76  | -2.6043 | -1.363  | 6.1138  |
| H77  | 1.5437  | -0.7963 | 5.1947  |
| H78  | 1.0348  | -0.5918 | 2.7901  |
| H79  | -3.5765 | 4.929   | 3.5567  |
| H80  | 0.1201  | 3.1118  | 4.7662  |
| H81  | 0.1401  | 1.6992  | 2.7261  |
| H82  | -3.1648 | 1.246   | -1.6242 |
| H83  | -5.2578 | 2.396   | -2.3218 |
| H84  | -5.2789 | 4.7084  | 1.3016  |
| C85  | 0.1981  | -2.6313 | 0.5179  |
| C86  | -0.8175 | -3.477  | 0.0249  |
| C87  | 1.2767  | -3.0662 | 1.3165  |
| C88  | -0.7636 | -4.8419 | 0.342   |
| H89  | -1.6128 | -3.0577 | -0.5841 |
| C90  | 1.3556  | -4.4266 | 1.649   |
| H91  | 2.0155  | -2.3457 | 1.6535  |
| C92  | 0.3229  | -5.1899 | 1.1279  |
| C93  | -1.4644 | -6.1181 | 0.1449  |
| C94  | 2.1652  | -5.407  | 2.3839  |
| N95  | 0.3873  | -6.5178 | 1.4445  |
| C96  | -2.6227 | -6.4855 | -0.5406 |
| C97  | -0.7218 | -7.1339 | 0.8427  |
| C98  | 1.5345  | -6.692  | 2.2347  |
| C99  | 3.3366  | -5.3168 | 3.1356  |
| C100 | -3.0301 | -7.82   | -0.5329 |
| H101 | -3.2014 | -5.7381 | -1.0754 |
| C102 | -1.1282 | -8.4639 | 0.8501  |
| C103 | 2.0621  | -7.8381 | 2.8188  |
| C104 | 3.8653  | -6.4673 | 3.7214  |
| H105 | 3.8308  | -4.3582 | 3.2626  |
| C106 | -2.2921 | -8.7927 | 0.1528  |
| H107 | -3.9309 | -8.1092 | -1.0653 |
| H108 | -0.5623 | -9.2235 | 1.3786  |
| C109 | 3.2354  | -7.7079 | 3.5639  |
| H110 | 1.5811  | -8.8033 | 2.7021  |

|      |         |         |         |
|------|---------|---------|---------|
| H111 | 4.7768  | -6.4007 | 4.3073  |
| H112 | -2.6287 | -9.825  | 0.1444  |
| H113 | 3.6652  | -8.5899 | 4.0293  |
| H114 | -6.2933 | 4.0982  | -0.8841 |
| H115 | -1.7135 | 4.6958  | 5.1875  |
| H116 | -6.7191 | -1.3698 | 2.9596  |
| H117 | -0.2375 | -1.2097 | 6.8484  |
| H118 | 3.8832  | -5.4624 | -3.7176 |
| H119 | 3.3621  | 0.6443  | -7.0498 |
| H120 | 5.191   | 5.2992  | -1.3748 |
| H121 | 7.0762  | -0.6482 | 1.1551  |

#### 4CzBN T<sub>1</sub>

|     |         |         |         |
|-----|---------|---------|---------|
| C1  | 0.0242  | 1.4299  | -0.4875 |
| C2  | -1.1881 | 0.7997  | -0.3973 |
| C3  | -1.2625 | -0.6274 | -0.3537 |
| C4  | 0.01    | -1.4082 | -0.5065 |
| C5  | 1.2362  | -0.7395 | -0.3385 |
| C6  | 1.2623  | 0.6648  | -0.3042 |
| C7  | 0.0032  | -2.8072 | -0.6724 |
| N8  | 0.0065  | -3.9664 | -0.7975 |
| N9  | 2.4293  | -1.4859 | -0.267  |
| C10 | 2.7557  | -2.4083 | 0.7392  |
| C11 | 4.1242  | -2.7258 | 0.6379  |
| C12 | 4.6526  | -1.9761 | -0.4851 |
| C13 | 3.5839  | -1.2313 | -1.018  |
| N14 | 2.4253  | 1.3926  | -0.0888 |
| C15 | 2.8941  | 2.4107  | -0.9377 |
| C16 | 4.1718  | 2.8147  | -0.5045 |
| C17 | 4.4972  | 2.0131  | 0.6623  |
| C18 | 3.4003  | 1.1621  | 0.8943  |
| C19 | -4.0014 | 2.8725  | 0.6015  |
| C20 | -2.6347 | 2.5292  | 0.6577  |
| N21 | -2.3642 | 1.5793  | -0.3366 |
| C22 | -3.5493 | 1.3331  | -1.0379 |
| C23 | -4.5856 | 2.1074  | -0.4823 |
| C24 | -4.3974 | -2.4514 | -0.2697 |
| C25 | -4.4953 | -1.633  | 0.9284  |

|     |         |         |         |
|-----|---------|---------|---------|
| C26 | -3.2765 | -0.9422 | 1.0487  |
| N27 | -2.4364 | -1.2862 | -0.0246 |
| C28 | -3.1259 | -2.2204 | -0.8271 |
| C29 | 5.9193  | -1.8735 | -1.0618 |
| C30 | 6.0949  | -1.0338 | -2.1529 |
| C31 | 5.0135  | -0.317  | -2.6844 |
| C32 | 3.742   | -0.4141 | -2.135  |
| C33 | 1.9602  | -2.9147 | 1.7661  |
| C34 | 2.5641  | -3.7623 | 2.6859  |
| C35 | 3.9214  | -4.1004 | 2.5916  |
| C36 | 4.7069  | -3.585  | 1.5705  |
| C37 | 5.5929  | 1.975   | 1.5206  |
| C38 | 5.57    | 1.0935  | 2.5959  |
| C39 | 4.4507  | 0.2867  | 2.8375  |
| C40 | 3.3405  | 0.3228  | 2.0028  |
| C41 | 2.3197  | 2.9176  | -2.1026 |
| C42 | 3.0288  | 3.8942  | -2.7941 |
| C43 | 4.284   | 4.3327  | -2.3558 |
| C44 | 4.8675  | 3.7872  | -1.2176 |
| C45 | -3.7583 | 0.5091  | -2.1414 |
| C46 | -5.0492 | 0.4253  | -2.645  |
| C47 | -6.1003 | 1.1659  | -2.0847 |
| C48 | -5.8738 | 2.0181  | -1.0131 |
| C49 | -4.5289 | 3.7701  | 1.5308  |
| C50 | -3.6945 | 4.2994  | 2.5054  |
| C51 | -2.3411 | 3.9374  | 2.5565  |
| C52 | -1.7902 | 3.0529  | 1.6372  |
| C53 | -5.4886 | -1.4415 | 1.8837  |
| C54 | -5.2425 | -0.5688 | 2.9402  |
| C55 | -4.0081 | 0.0795  | 3.0653  |
| C56 | -2.9973 | -0.1135 | 2.1304  |
| C57 | -2.7577 | -2.7543 | -2.0598 |
| C58 | -3.67   | -3.5873 | -2.6957 |
| C59 | -4.9246 | -3.8573 | -2.1353 |
| C60 | -5.3008 | -3.2818 | -0.9269 |
| H61 | 0.0714  | 2.507   | -0.5779 |
| H62 | 6.7527  | -2.4416 | -0.6596 |
| H63 | 7.0757  | -0.9357 | -2.6058 |
| H64 | 5.167   | 0.3289  | -3.5431 |

|     |         |         |         |
|-----|---------|---------|---------|
| H65 | 2.9053  | 0.1319  | -2.5579 |
| H66 | 0.9083  | -2.6626 | 1.845   |
| H67 | 1.9652  | -4.1763 | 3.4906  |
| H68 | 4.3573  | -4.7721 | 3.3235  |
| H69 | 5.7612  | -3.835  | 1.5003  |
| H70 | 6.4462  | 2.6248  | 1.353   |
| H71 | 6.4213  | 1.0414  | 3.2662  |
| H72 | 4.4432  | -0.3828 | 3.6913  |
| H73 | 2.4661  | -0.2829 | 2.2089  |
| H74 | 1.3656  | 2.5559  | -2.4698 |
| H75 | 2.6017  | 4.3146  | -3.6985 |
| H76 | 4.8122  | 5.0932  | -2.9207 |
| H77 | 5.8558  | 4.1014  | -0.8964 |
| H78 | -2.9437 | -0.0508 | -2.5874 |
| H79 | -5.2431 | -0.2303 | -3.488  |
| H80 | -7.0975 | 1.0774  | -2.5026 |
| H81 | -6.6829 | 2.6074  | -0.5923 |
| H82 | -5.5803 | 4.0394  | 1.4958  |
| H83 | -4.0898 | 4.9985  | 3.2346  |
| H84 | -1.7042 | 4.3591  | 3.3275  |
| H85 | -0.7433 | 2.7745  | 1.6871  |
| H86 | -6.4367 | -1.9645 | 1.8069  |
| H87 | -6.0117 | -0.3993 | 3.6862  |
| H88 | -3.8312 | 0.7464  | 3.9026  |
| H89 | -2.0316 | 0.3682  | 2.237   |
| H90 | -1.7967 | -2.5351 | -2.5103 |
| H91 | -3.4016 | -4.0317 | -3.6481 |
| H92 | -5.6142 | -4.511  | -2.6587 |
| H93 | -6.2869 | -3.4608 | -0.51   |

#### 4CzBN-BP T<sub>1</sub>

|    |         |         |         |
|----|---------|---------|---------|
| C1 | 0.1684  | -1.031  | 0.1303  |
| C2 | -1.106  | -0.2622 | 0.1098  |
| C3 | -1.1227 | 1.0885  | -0.2272 |
| C4 | 0.0942  | 1.7627  | -0.4742 |
| C5 | 1.3757  | 1.049   | -0.3084 |
| C6 | 1.3825  | -0.3076 | -0.0162 |
| C7 | 0.0929  | 3.1113  | -0.8899 |

|     |         |         |         |
|-----|---------|---------|---------|
| N8  | 0.092   | 4.226   | -1.2307 |
| N9  | 2.5462  | 1.7967  | -0.4407 |
| C10 | 2.904   | 2.874   | 0.3917  |
| C11 | 4.2447  | 3.2146  | 0.1459  |
| C12 | 4.7283  | 2.3191  | -0.8885 |
| C13 | 3.6604  | 1.4696  | -1.2242 |
| N14 | 2.6273  | -0.9614 | 0.1614  |
| C15 | 3.1825  | -1.9856 | -0.6096 |
| C16 | 4.4748  | -2.2716 | -0.1297 |
| C17 | 4.7084  | -1.3974 | 1.0006  |
| C18 | 3.546   | -0.6196 | 1.1555  |
| C19 | -3.6693 | -1.9972 | 2.0014  |
| C20 | -2.3478 | -1.5621 | 1.8151  |
| N21 | -2.2487 | -0.912  | 0.5674  |
| C22 | -3.519  | -0.9224 | -0.025  |
| C23 | -4.4183 | -1.5928 | 0.8236  |
| C24 | -4.1794 | 2.9221  | -0.9843 |
| C25 | -4.3465 | 2.659   | 0.4303  |
| C26 | -3.1785 | 2.0042  | 0.8646  |
| N27 | -2.3148 | 1.8477  | -0.2216 |
| C28 | -2.9181 | 2.4161  | -1.3464 |
| C29 | 5.9479  | 2.1898  | -1.5511 |
| C30 | 6.0968  | 1.2227  | -2.5423 |
| C31 | 4.995   | 0.4163  | -2.8842 |
| C32 | 3.7674  | 0.5359  | -2.2505 |
| C33 | 2.1689  | 3.4958  | 1.3998  |
| C34 | 2.7981  | 4.4961  | 2.1268  |
| C35 | 4.1323  | 4.8765  | 1.8879  |
| C36 | 4.854   | 4.2198  | 0.8959  |
| C37 | 5.7817  | -1.215  | 1.8771  |
| C38 | 5.6934  | -0.2718 | 2.8941  |
| C39 | 4.5053  | 0.4714  | 3.0382  |
| C40 | 3.4213  | 0.307   | 2.19    |
| C41 | 2.6634  | -2.6511 | -1.7212 |
| C42 | 3.4628  | -3.5998 | -2.3382 |
| C43 | 4.7601  | -3.907  | -1.8813 |
| C44 | 5.2574  | -3.2354 | -0.7728 |
| C45 | -3.9052 | -0.4693 | -1.2827 |
| C46 | -5.2329 | -0.6374 | -1.6428 |



|     |         |         |         |
|-----|---------|---------|---------|
| C47 | -6.1657 | -1.2716 | -0.8022 |
| C48 | -5.7423 | -1.7664 | 0.431   |
| C49 | -4.0349 | -2.6152 | 3.1948  |
| C50 | -3.0891 | -2.7858 | 4.2039  |
| C51 | -1.786  | -2.2958 | 4.0064  |
| C52 | -1.4001 | -1.668  | 2.8295  |
| C53 | -5.3751 | 2.911   | 1.3423  |
| C54 | -5.2393 | 2.5152  | 2.6672  |
| C55 | -4.0482 | 1.8815  | 3.0735  |
| C56 | -3.006  | 1.6279  | 2.1951  |
| C57 | -2.4666 | 2.4541  | -2.6649 |
| C58 | -3.303  | 3.0261  | -3.6109 |
| C59 | -4.5665 | 3.5556  | -3.2799 |
| C60 | -4.998  | 3.4968  | -1.9606 |
| C61 | -2.6575 | -3.4747 | -2.0917 |
| C62 | -1.4618 | -2.8269 | -1.7383 |
| C63 | -1.0135 | -1.7889 | -2.5704 |
| C64 | -1.7058 | -1.4496 | -3.7318 |
| C65 | -2.8715 | -2.1238 | -4.0792 |
| C66 | -3.3507 | -3.132  | -3.2446 |
| C67 | 0.9663  | -3.1024 | 1.2167  |
| C68 | 0.952   | -4.4676 | 1.4266  |
| C69 | 0.1149  | -5.2755 | 0.6518  |
| C70 | -0.6749 | -4.6977 | -0.3288 |
| C71 | -0.6815 | -3.3138 | -0.5668 |
| C72 | 0.146   | -2.4899 | 0.2444  |
| H73 | 6.7791  | 2.843   | -1.2985 |
| H74 | 5.1082  | -0.327  | -3.6689 |
| H75 | 2.9243  | -0.0793 | -2.5444 |
| H76 | 1.1416  | 3.2166  | 1.6113  |
| H77 | 2.2411  | 5.0043  | 2.9095  |
| H78 | 5.8927  | 4.4824  | 0.712   |
| H79 | 6.686   | -1.8081 | 1.764   |
| H80 | 4.4374  | 1.2038  | 3.8387  |
| H81 | 2.5157  | 0.8895  | 2.3227  |
| H82 | 1.6661  | -2.445  | -2.0928 |
| H83 | 3.0735  | -4.1298 | -3.2038 |
| H84 | 6.2578  | -3.4551 | -0.4077 |
| H85 | -3.1963 | -0.0249 | -1.9692 |

|      |         |         |         |
|------|---------|---------|---------|
| H86  | -5.5578 | -0.2728 | -2.614  |
| H87  | -6.442  | -2.287  | 1.0797  |
| H88  | -5.0589 | -2.9466 | 3.3465  |
| H89  | -1.0581 | -2.4006 | 4.8063  |
| H90  | -0.3976 | -1.2691 | 2.7127  |
| H91  | -6.2803 | 3.4173  | 1.0159  |
| H92  | -3.9422 | 1.5787  | 4.1123  |
| H93  | -2.0946 | 1.1464  | 2.5345  |
| H94  | -1.4953 | 2.0539  | -2.9395 |
| H95  | -2.9713 | 3.0741  | -4.6451 |
| H96  | -5.974  | 3.8916  | -1.689  |
| H97  | -3.0603 | -4.2375 | -1.4324 |
| H98  | -0.104  | -1.2505 | -2.3253 |
| H99  | -1.3256 | -0.6554 | -4.3672 |
| H100 | -3.409  | -1.8581 | -4.9838 |
| H101 | -4.2783 | -3.643  | -3.4835 |
| H102 | 1.5933  | -2.471  | 1.8396  |
| H103 | 1.5865  | -4.9017 | 2.1921  |
| H104 | 0.0979  | -6.3506 | 0.7971  |
| H105 | -1.2731 | -5.3373 | -0.969  |
| H106 | -6.0204 | 2.6841  | 3.3788  |
| H107 | -5.1719 | 3.9998  | -4.0422 |
| H108 | 7.0311  | 1.0885  | -3.0463 |
| H109 | 4.5736  | 5.6604  | 2.4672  |
| H110 | 5.3399  | -4.6508 | -2.3868 |
| H111 | 6.5104  | -0.1011 | 3.5636  |
| H112 | -3.3423 | -3.2756 | 5.1209  |
| H113 | -7.1822 | -1.3763 | -1.1194 |

#### 4CzBN-ICz T<sub>1</sub>

|    |         |         |         |
|----|---------|---------|---------|
| C1 | 0.0198  | 1.4892  | -0.2542 |
| C2 | -1.0279 | 0.8531  | 0.3199  |
| C3 | -1.1068 | -0.5872 | 0.3096  |
| C4 | -0.0746 | -1.3608 | -0.4491 |
| C5 | 1.0725  | -0.6967 | -0.866  |
| C6 | 1.1678  | 0.7045  | -0.7453 |
| C7 | -0.1457 | -2.7651 | -0.5749 |
| N8 | -0.1976 | -3.9249 | -0.6775 |

|     |         |         |         |
|-----|---------|---------|---------|
| N9  | 2.1334  | -1.4409 | -1.4316 |
| C10 | 2.9457  | -2.3543 | -0.758  |
| C11 | 4.0828  | -2.6229 | -1.5443 |
| C12 | 3.9448  | -1.8506 | -2.7652 |
| C13 | 2.7346  | -1.1429 | -2.657  |
| N14 | 2.308   | 1.422   | -1.1046 |
| C15 | 2.3453  | 2.4408  | -2.0742 |
| C16 | 3.6871  | 2.7627  | -2.3496 |
| C17 | 4.5113  | 1.9133  | -1.5024 |
| C18 | 3.6289  | 1.1187  | -0.7504 |
| C19 | -3.2933 | 2.6382  | 2.5364  |
| C20 | -1.9938 | 2.3629  | 2.0667  |
| N21 | -2.0831 | 1.6063  | 0.8961  |
| C22 | -3.4362 | 1.4236  | 0.6012  |
| C23 | -4.2192 | 2.0349  | 1.5959  |
| C24 | -4.1045 | -2.3102 | 1.3982  |
| C25 | -3.6764 | -1.6466 | 2.6253  |
| C26 | -2.4405 | -1.0418 | 2.3378  |
| N27 | -2.1017 | -1.2654 | 0.9972  |
| C28 | -3.1073 | -2.0735 | 0.4335  |
| C29 | 4.7292  | -1.6931 | -3.9114 |
| C30 | 4.3077  | -0.8466 | -4.9291 |
| C31 | 3.0792  | -0.1707 | -4.7975 |
| C32 | 2.2754  | -0.3118 | -3.6775 |
| C33 | 2.7784  | -2.9201 | 0.5052  |
| C34 | 3.7885  | -3.7484 | 0.9718  |
| C35 | 4.939   | -4.0366 | 0.2133  |
| C36 | 5.0753  | -3.471  | -1.049  |
| C37 | 5.8846  | 1.7856  | -1.3114 |
| C38 | 6.3682  | 0.8766  | -0.3708 |
| C39 | 5.4568  | 0.1353  | 0.4024  |
| C40 | 4.0846  | 0.2568  | 0.2429  |
| C41 | 1.2953  | 3.036   | -2.7705 |
| C42 | 1.6222  | 3.9908  | -3.7252 |
| C43 | 2.9514  | 4.3468  | -4.0099 |
| C44 | 3.9846  | 3.717   | -3.3181 |
| C45 | -4.0151 | 0.7781  | -0.4903 |
| C46 | -5.3976 | 0.7012  | -0.5294 |
| C47 | -6.2105 | 1.2747  | 0.4681  |

|     |         |         |         |
|-----|---------|---------|---------|
| C48 | -5.6129 | 1.9558  | 1.5213  |
| C49 | -3.4626 | 3.3421  | 3.7305  |
| C50 | -2.3508 | 3.7614  | 4.4518  |
| C51 | -1.0652 | 3.4713  | 3.9551  |
| C52 | -0.8636 | 2.7826  | 2.7684  |
| C53 | -4.2119 | -1.5295 | 3.901   |
| C54 | -3.5065 | -0.829  | 4.8849  |
| C55 | -2.2465 | -0.2881 | 4.5807  |
| C56 | -1.687  | -0.3982 | 3.3152  |
| C57 | -3.2511 | -2.4913 | -0.8868 |
| C58 | -4.4022 | -3.1977 | -1.2095 |
| C59 | -5.4046 | -3.4704 | -0.2642 |
| C60 | -5.2513 | -3.0104 | 1.0456  |
| H61 | 5.6691  | -2.2306 | -4.0096 |
| H62 | 2.752   | 0.4819  | -5.6034 |
| H63 | 1.326   | 0.2075  | -3.5933 |
| H64 | 1.8932  | -2.7194 | 1.0996  |
| H65 | 3.6843  | -4.2051 | 1.9528  |
| H66 | 5.9595  | -3.682  | -1.6456 |
| H67 | 6.5789  | 2.3895  | -1.8896 |
| H68 | 5.8397  | -0.5564 | 1.1482  |
| H69 | 3.3942  | -0.3083 | 0.8576  |
| H70 | 0.2634  | 2.7583  | -2.5859 |
| H71 | 0.822   | 4.4769  | -4.2772 |
| H72 | 5.0194  | 3.9608  | -3.5438 |
| H73 | -3.4027 | 0.3333  | -1.2677 |
| H74 | -5.8728 | 0.1775  | -1.3551 |
| H75 | -6.2289 | 2.4175  | 2.2891  |
| H76 | -4.4633 | 3.5535  | 4.0995  |
| H77 | -0.1995 | 3.8062  | 4.5213  |
| H78 | 0.1354  | 2.5693  | 2.4032  |
| H79 | -5.1706 | -1.9799 | 4.1424  |
| H80 | -1.6974 | 0.2336  | 5.3599  |
| H81 | -0.7049 | 0.002   | 3.0903  |
| H82 | -2.4957 | -2.2775 | -1.6335 |
| H83 | -4.535  | -3.5517 | -2.2277 |
| H84 | -6.0362 | -3.186  | 1.7764  |
| C85 | 0.0818  | 2.9676  | -0.2838 |
| C86 | 1.2485  | 3.5879  | 0.21    |

|      |         |         |         |
|------|---------|---------|---------|
| C87  | -1.0294 | 3.664   | -0.8039 |
| C88  | 1.3217  | 4.9881  | 0.1883  |
| H89  | 2.0583  | 2.9743  | 0.5932  |
| C90  | -0.9833 | 5.0654  | -0.8377 |
| H91  | -1.8884 | 3.1057  | -1.1634 |
| C92  | 0.1937  | 5.598   | -0.3359 |
| C93  | 2.1931  | 6.1203  | 0.5313  |
| C94  | -1.7551 | 6.2532  | -1.2257 |
| N95  | 0.2519  | 6.9631  | -0.3626 |
| C96  | 3.4665  | 6.2207  | 1.0925  |
| C97  | 1.4966  | 7.328   | 0.1756  |
| C98  | -0.9579 | 7.4107  | -0.9165 |
| C99  | -3.0163 | 6.4377  | -1.792  |
| C100 | 4.0298  | 7.4812  | 1.2938  |
| H101 | 4.0136  | 5.3244  | 1.3698  |
| C102 | 2.0584  | 8.5841  | 0.3764  |
| C103 | -1.4126 | 8.7005  | -1.1674 |
| C104 | -3.4719 | 7.7321  | -2.0435 |
| H105 | -3.6364 | 5.5797  | -2.0341 |
| C106 | 3.3342  | 8.6439  | 0.9401  |
| H107 | 5.0205  | 7.5628  | 1.7303  |
| H108 | 1.5264  | 9.4897  | 0.1052  |
| C109 | -2.68   | 8.8449  | -1.7347 |
| H110 | -0.8062 | 9.5683  | -0.9317 |
| H111 | -4.453  | 7.8795  | -2.484  |
| H112 | 3.7931  | 9.614   | 1.1061  |
| H113 | -3.0556 | 9.8431  | -1.9391 |
| H114 | 5.6843  | -4.6955 | 0.6072  |
| H115 | -6.2725 | -4.0255 | -0.5533 |
| H116 | -3.9116 | -0.7015 | 5.867   |
| H117 | -7.2741 | 1.1775  | 0.4027  |
| H118 | -2.4556 | 4.3014  | 5.3696  |
| H119 | 3.1561  | 5.0863  | -4.7557 |
| H120 | 4.9002  | -0.6987 | -5.8077 |
| H121 | 7.4194  | 0.7383  | -0.2262 |

#### 4CzBN-ICz S<sub>2</sub>

|    |        |         |        |
|----|--------|---------|--------|
| C1 | 0.1431 | -1.1506 | 0.1881 |
|----|--------|---------|--------|

|     |         |         |         |
|-----|---------|---------|---------|
| C2  | -0.311  | -0.1976 | 1.1095  |
| C3  | -0.5817 | 1.1065  | 0.7244  |
| C4  | -0.4389 | 1.5411  | -0.6468 |
| C5  | 0.2386  | 0.6256  | -1.5237 |
| C6  | 0.5236  | -0.662  | -1.125  |
| C7  | -0.8725 | 2.8035  | -1.0627 |
| N8  | -1.2564 | 3.8736  | -1.3368 |
| N9  | 0.6453  | 1.1215  | -2.7873 |
| C10 | 1.6041  | 2.1147  | -2.9877 |
| C11 | 1.7153  | 2.3799  | -4.3631 |
| C12 | 0.752   | 1.5322  | -5.0301 |
| C13 | 0.1071  | 0.7852  | -4.0287 |
| N14 | 1.3068  | -1.4993 | -1.973  |
| C15 | 0.8997  | -2.6087 | -2.7141 |
| C16 | 2.0208  | -3.1863 | -3.3382 |
| C17 | 3.1705  | -2.4082 | -2.9368 |
| C18 | 2.6906  | -1.3903 | -2.0941 |
| C19 | 0.3568  | -0.8377 | 4.6404  |
| C20 | 0.7415  | -0.7548 | 3.2892  |
| N21 | -0.3833 | -0.5256 | 2.5002  |
| C22 | -1.4951 | -0.466  | 3.3444  |
| C23 | -1.0771 | -0.6523 | 4.6746  |
| C24 | -1.9802 | 3.7531  | 2.8171  |
| C25 | -0.587  | 3.755   | 3.2599  |
| C26 | 0.0605  | 2.744   | 2.5244  |
| N27 | -0.8661 | 2.1127  | 1.6956  |
| C28 | -2.0815 | 2.7265  | 1.8473  |
| C29 | 0.377   | 1.3713  | -6.3635 |
| C30 | -0.6368 | 0.4849  | -6.6982 |
| C31 | -1.276  | -0.2334 | -5.6725 |
| C32 | -0.9224 | -0.0964 | -4.3418 |
| C33 | 2.3815  | 2.8     | -2.0576 |
| C34 | 3.2796  | 3.7394  | -2.532  |
| C35 | 3.4237  | 4.0161  | -3.903  |
| C36 | 2.6314  | 3.3299  | -4.8123 |
| C37 | 4.537   | -2.5036 | -3.1997 |
| C38 | 5.4211  | -1.6033 | -2.6223 |
| C39 | 4.9136  | -0.6057 | -1.7714 |
| C40 | 3.5624  | -0.4838 | -1.4962 |

|     |         |         |         |
|-----|---------|---------|---------|
| C41 | -0.3671 | -3.1642 | -2.8794 |
| C42 | -0.489  | -4.282  | -3.6852 |
| C43 | 0.6118  | -4.869  | -4.3337 |
| C44 | 1.8673  | -4.3113 | -4.149  |
| C45 | -2.842  | -0.3046 | 3.0352  |
| C46 | -3.7499 | -0.2938 | 4.0812  |
| C47 | -3.3597 | -0.4529 | 5.4216  |
| C48 | -2.0144 | -0.6415 | 5.707   |
| C49 | 1.3201  | -1.0503 | 5.6249  |
| C50 | 2.6577  | -1.1719 | 5.2738  |
| C51 | 3.0156  | -1.0703 | 3.9174  |
| C52 | 2.0816  | -0.864  | 2.9173  |
| C53 | 0.1329  | 4.5162  | 4.1542  |
| C54 | 1.5099  | 4.2771  | 4.3184  |
| C55 | 2.1257  | 3.2787  | 3.5614  |
| C56 | 1.4187  | 2.4968  | 2.653   |
| C57 | -3.2792 | 2.4539  | 1.1788  |
| C58 | -4.3779 | 3.2276  | 1.5068  |
| C59 | -4.3061 | 4.2498  | 2.4634  |
| C60 | -3.088  | 4.5056  | 3.1243  |
| H61 | 0.8733  | 1.9452  | -7.1412 |
| H62 | -2.0747 | -0.9221 | -5.9335 |
| H63 | -1.4314 | -0.6604 | -3.5707 |
| H64 | 2.273   | 2.619   | -0.9943 |
| H65 | 3.8907  | 4.2875  | -1.8202 |
| H66 | 2.7234  | 3.537   | -5.8749 |
| H67 | 4.9116  | -3.2863 | -3.8535 |
| H68 | 5.6063  | 0.0994  | -1.3205 |
| H69 | 3.1936  | 0.3055  | -0.8525 |
| H70 | -1.2368 | -2.7499 | -2.3867 |
| H71 | -1.4721 | -4.7251 | -3.8187 |
| H72 | 2.7333  | -4.7526 | -4.6347 |
| H73 | -3.1781 | -0.2327 | 2.0092  |
| H74 | -4.8051 | -0.1749 | 3.8518  |
| H75 | -1.6936 | -0.7858 | 6.7349  |
| H76 | 1.0267  | -1.1188 | 6.6687  |
| H77 | 4.0628  | -1.1648 | 3.6441  |
| H78 | 2.3801  | -0.8014 | 1.8779  |
| H79 | -0.3465 | 5.3041  | 4.7268  |

|      |         |         |         |
|------|---------|---------|---------|
| H80  | 3.1894  | 3.1051  | 3.6859  |
| H81  | 1.9063  | 1.7277  | 2.0704  |
| H82  | -3.3312 | 1.6745  | 0.4306  |
| H83  | -5.322  | 3.0471  | 1.0046  |
| H84  | -3.0374 | 5.298   | 3.864   |
| H85  | 4.1309  | 4.7499  | -4.2291 |
| H86  | -0.9339 | 0.3433  | -7.7162 |
| H87  | 0.4716  | -5.7294 | -4.9541 |
| H88  | 6.4715  | -1.6549 | -2.8196 |
| H89  | -4.0938 | -0.4376 | 6.1998  |
| H90  | 3.4101  | -1.348  | 6.0138  |
| H91  | 2.0764  | 4.8473  | 5.0247  |
| H92  | -5.1682 | 4.8477  | 2.6738  |
| C93  | 0.2194  | -2.6509 | 0.527   |
| C94  | -1.0034 | -3.3313 | 0.7     |
| C95  | 1.5057  | -3.2182 | 0.6358  |
| C96  | -0.9387 | -4.7319 | 1.0163  |
| H97  | -1.9499 | -2.8041 | 0.5949  |
| C98  | 1.5816  | -4.6182 | 0.9519  |
| H99  | 2.3947  | -2.6088 | 0.4844  |
| C100 | 0.3485  | -5.2086 | 1.1046  |
| C101 | -1.7573 | -5.8953 | 1.2922  |
| C102 | 2.5143  | -5.7019 | 1.1834  |
| N103 | 0.419   | -6.5939 | 1.4173  |
| C104 | -3.1383 | -6.1282 | 1.3662  |
| C105 | -0.8698 | -7.0467 | 1.5392  |
| C106 | 1.7481  | -6.9274 | 1.473   |
| C107 | 3.9126  | -5.8085 | 1.1863  |
| C108 | -3.6065 | -7.4105 | 1.6634  |
| H109 | -3.8409 | -5.3132 | 1.1927  |
| C110 | -1.3558 | -8.33   | 1.8365  |
| C111 | 2.3624  | -8.1599 | 1.744   |
| C112 | 4.5091  | -7.0423 | 1.4576  |
| H113 | 4.5285  | -4.9332 | 0.9781  |
| C114 | -2.7337 | -8.5061 | 1.8975  |
| H115 | -4.6837 | -7.5787 | 1.7182  |
| H116 | -0.6724 | -9.1605 | 2.0137  |
| C117 | 3.7517  | -8.2112 | 1.7348  |
| H118 | 1.7659  | -9.0478 | 1.9548  |



|      |         |         |        |
|------|---------|---------|--------|
| H119 | 5.5983  | -7.1129 | 1.4569 |
| H120 | -3.1478 | -9.487  | 2.1254 |
| H121 | 4.2629  | -9.1502 | 1.9407 |

#### 4CzBN T<sub>2</sub>

|     |         |         |         |
|-----|---------|---------|---------|
| C1  | 0.0022  | 1.3664  | -0.1778 |
| C2  | -1.2208 | 0.6913  | -0.1778 |
| C3  | -1.2324 | -0.7112 | -0.0127 |
| C4  | 0.0044  | -1.3798 | 0.158   |
| C5  | 1.24    | -0.6877 | 0.1622  |
| C6  | 1.2262  | 0.7132  | -0.0154 |
| C7  | 0.0056  | -2.8029 | 0.3321  |
| N8  | 0.0066  | -3.9567 | 0.4731  |
| N9  | 2.4428  | -1.403  | 0.3438  |
| C10 | 2.8243  | -2.0943 | 1.5095  |
| C11 | 4.0993  | -2.6699 | 1.2985  |
| C12 | 4.5016  | -2.3323 | -0.052  |
| C13 | 3.4623  | -1.5532 | -0.6137 |
| C14 | -3.9428 | 3.118   | 0.05    |
| C15 | -2.7728 | 2.499   | 0.5528  |
| N16 | -2.4065 | 1.4517  | -0.3098 |
| C17 | -3.3119 | 1.4284  | -1.3855 |
| C18 | -4.2822 | 2.4406  | -1.1845 |
| C19 | -4.0881 | -2.9135 | -0.6372 |
| C20 | -4.4912 | -2.2609 | 0.5923  |
| C21 | -3.4532 | -1.3678 | 0.9496  |
| N22 | -2.4338 | -1.4511 | -0.0163 |
| C23 | -2.8139 | -2.4035 | -0.9809 |
| C24 | 5.6272  | -2.6365 | -0.8253 |
| C25 | 5.6958  | -2.1697 | -2.135  |
| C26 | 4.6477  | -1.4095 | -2.6789 |
| C27 | 3.5154  | -1.0944 | -1.9294 |
| C28 | 2.1516  | -2.2227 | 2.7256  |
| C29 | 2.7766  | -2.9494 | 3.7378  |
| C30 | 4.04    | -3.5311 | 3.5456  |
| C31 | 4.7056  | -3.3944 | 2.3305  |
| C32 | -3.3156 | 0.6277  | -2.5274 |
| C33 | -4.3315 | 0.8329  | -3.4593 |

|     |         |         |         |
|-----|---------|---------|---------|
| C34 | -5.315  | 1.8167  | -3.2664 |
| C35 | -5.2932 | 2.6257  | -2.1342 |
| C36 | -4.5169 | 4.1806  | 0.7564  |
| C37 | -3.9223 | 4.6098  | 1.94    |
| C38 | -2.762  | 3.9843  | 2.4242  |
| C39 | -2.1723 | 2.9212  | 1.7411  |
| C40 | -5.6165 | -2.3717 | 1.4164  |
| C41 | -5.686  | -1.6031 | 2.575   |
| C42 | -4.6392 | -0.7326 | 2.9194  |
| C43 | -3.5074 | -0.6056 | 2.1159  |
| C44 | -2.1409 | -2.8203 | -2.1302 |
| C45 | -2.7645 | -3.7705 | -2.9375 |
| C46 | -4.0271 | -4.2906 | -2.6105 |
| C47 | -4.693  | -3.8662 | -1.464  |
| H48 | 0.0013  | 2.4429  | -0.3095 |
| H49 | 6.4334  | -3.2348 | -0.4094 |
| H50 | 6.5646  | -2.399  | -2.7451 |
| H51 | 4.7161  | -1.0577 | -3.7044 |
| H52 | 2.7109  | -0.5099 | -2.3622 |
| H53 | 1.1697  | -1.7872 | 2.8819  |
| H54 | 2.2692  | -3.071  | 4.6907  |
| H55 | 4.4995  | -4.0942 | 4.3527  |
| H56 | 5.6846  | -3.8427 | 2.1842  |
| H57 | -2.5644 | -0.1358 | -2.6916 |
| H58 | -4.3591 | 0.2141  | -4.3517 |
| H59 | -6.0948 | 1.9493  | -4.0107 |
| H60 | -6.0455 | 3.3969  | -1.9917 |
| H61 | -5.4161 | 4.6642  | 0.3844  |
| H62 | -4.3579 | 5.4356  | 2.4947  |
| H63 | -2.3106 | 4.333   | 3.3488  |
| H64 | -1.2742 | 2.4467  | 2.1243  |
| H65 | -6.4216 | -3.0539 | 1.1571  |
| H66 | -6.5547 | -1.68   | 3.2226  |
| H67 | -4.7084 | -0.1442 | 3.8299  |
| H68 | -2.7038 | 0.0672  | 2.3949  |
| H69 | -1.1596 | -2.4336 | -2.3872 |
| H70 | -2.2568 | -4.1174 | -3.833  |
| H71 | -4.4855 | -5.0325 | -3.258  |
| H72 | -5.6713 | -4.2677 | -1.2138 |

|     |        |        |         |
|-----|--------|--------|---------|
| N73 | 2.4568 | 1.5151 | -0.0729 |
| C74 | 2.8703 | 2.2537 | -1.1697 |
| C75 | 3.3693 | 1.6406 | 0.9621  |
| C76 | 4.1304 | 2.8898 | -0.8036 |
| C77 | 2.2926 | 2.422  | -2.394  |
| C78 | 3.371  | 1.097  | 2.2132  |
| C79 | 4.4327 | 2.5185 | 0.4875  |
| C80 | 4.7903 | 3.7334 | -1.7844 |
| C81 | 2.9764 | 3.2645 | -3.3376 |
| H82 | 1.3554 | 1.9446 | -2.6564 |
| C83 | 4.4771 | 1.4208 | 3.0733  |
| H84 | 2.5757 | 0.4454 | 2.5566  |
| C85 | 5.5325 | 2.8216 | 1.3862  |
| C86 | 4.1952 | 3.8937 | -3.0154 |
| H87 | 5.7278 | 4.2182 | -1.5386 |
| H88 | 2.5396 | 3.4155 | -4.3178 |
| C89 | 5.5203 | 2.2656 | 2.6456  |
| H90 | 4.5037 | 1.0025 | 4.0727  |
| H91 | 6.3359 | 3.4712 | 1.059   |
| H92 | 4.6718 | 4.52   | -3.763  |
| H93 | 6.3329 | 2.4793 | 3.333   |

#### 4CzBN-BP T<sub>2</sub>

|     |         |         |         |
|-----|---------|---------|---------|
| C1  | 0.1047  | -1.113  | 0.111   |
| C2  | -1.1497 | -0.4503 | 0.1129  |
| C3  | -1.2194 | 0.9362  | -0.1449 |
| C4  | -0.0248 | 1.662   | -0.3359 |
| C5  | 1.2366  | 1.0418  | -0.2014 |
| C6  | 1.299   | -0.3494 | 0.0291  |
| C7  | -0.0884 | 3.0659  | -0.6191 |
| N8  | -0.1366 | 4.2027  | -0.8575 |
| N9  | 2.399   | 1.8427  | -0.2607 |
| C10 | 2.7633  | 2.8251  | 0.6808  |
| C11 | 3.99    | 3.4034  | 0.2853  |
| C12 | 4.3747  | 2.7736  | -0.9611 |
| C13 | 3.3732  | 1.8265  | -1.2734 |
| N14 | 2.5666  | -0.948  | 0.2869  |
| C15 | 3.3279  | -1.8177 | -0.5142 |

|     |         |         |         |
|-----|---------|---------|---------|
| C16 | 4.4881  | -2.2    | 0.2012  |
| C17 | 4.4218  | -1.5605 | 1.4966  |
| C18 | 3.227   | -0.8067 | 1.5197  |
| C19 | -3.8397 | -2.2278 | 1.8352  |
| C20 | -2.5433 | -1.6698 | 1.7729  |
| N21 | -2.3178 | -1.1699 | 0.4758  |
| C22 | -3.4914 | -1.377  | -0.2757 |
| C23 | -4.4415 | -2.0423 | 0.5326  |
| C24 | -4.1619 | 2.9253  | -1.0179 |
| C25 | -4.3214 | 2.7994  | 0.4163  |
| C26 | -3.2503 | 2.0047  | 0.8851  |
| N27 | -2.4537 | 1.6256  | -0.2099 |
| C28 | -2.9963 | 2.2087  | -1.3684 |
| C29 | 5.4492  | 2.9568  | -1.8393 |
| C30 | 5.5243  | 2.2173  | -3.0194 |
| C31 | 4.4948  | 1.2984  | -3.3125 |
| C32 | 3.415   | 1.0944  | -2.4589 |
| C33 | 2.1122  | 3.2355  | 1.8449  |
| C34 | 2.7133  | 4.2299  | 2.6101  |
| C35 | 3.9413  | 4.8226  | 2.2477  |
| C36 | 4.5723  | 4.3991  | 1.0786  |
| C37 | 5.2464  | -1.5872 | 2.6275  |
| C38 | 4.8854  | -0.8831 | 3.7762  |
| C39 | 3.6756  | -0.1577 | 3.7752  |
| C40 | 2.8371  | -0.1095 | 2.6649  |
| C41 | 3.1007  | -2.3007 | -1.8044 |
| C42 | 4.0441  | -3.1578 | -2.3623 |
| C43 | 5.2124  | -3.5486 | -1.6759 |
| C44 | 5.4228  | -3.0596 | -0.3881 |
| C45 | -3.7779 | -1.0589 | -1.6029 |
| C46 | -5.033  | -1.3967 | -2.0974 |
| C47 | -6.006  | -2.0529 | -1.3142 |
| C48 | -5.6939 | -2.3784 | 0.0045  |
| C49 | -4.3022 | -2.7783 | 3.0359  |
| C50 | -3.4941 | -2.7644 | 4.1729  |
| C51 | -2.2172 | -2.1722 | 4.0882  |
| C52 | -1.7288 | -1.622  | 2.9059  |
| C53 | -5.2528 | 3.3087  | 1.3288  |
| C54 | -5.1177 | 3.0414  | 2.691   |

|     |         |         |         |
|-----|---------|---------|---------|
| C55 | -4.0274 | 2.2587  | 3.1258  |
| C56 | -3.086  | 1.7365  | 2.2437  |
| C57 | -2.5574 | 2.1379  | -2.6913 |
| C58 | -3.3054 | 2.8011  | -3.6594 |
| C59 | -4.4744 | 3.5258  | -3.3442 |
| C60 | -4.8951 | 3.5789  | -2.0155 |
| H61 | 6.2234  | 3.6841  | -1.606  |
| H62 | 4.5441  | 0.7297  | -4.2382 |
| H63 | 2.6338  | 0.3886  | -2.7181 |
| H64 | 1.159   | 2.8117  | 2.1451  |
| H65 | 2.2139  | 4.5655  | 3.5161  |
| H66 | 5.5179  | 4.8466  | 0.7813  |
| H67 | 6.1687  | -2.1634 | 2.6136  |
| H68 | 3.3878  | 0.3882  | 4.6708  |
| H69 | 1.9177  | 0.4649  | 2.6956  |
| H70 | 2.2162  | -2.0354 | -2.3687 |
| H71 | 3.8696  | -3.5408 | -3.3654 |
| H72 | 6.3153  | -3.3486 | 0.1624  |
| H73 | -3.0522 | -0.5723 | -2.2419 |
| H74 | -5.2683 | -1.1463 | -3.1292 |
| H75 | -6.4257 | -2.8896 | 0.626   |
| H76 | -5.3003 | -3.2076 | 3.0867  |
| H77 | -1.5903 | -2.1419 | 4.9766  |
| H78 | -0.7459 | -1.1637 | 2.8806  |
| H79 | -6.0794 | 3.9216  | 0.9768  |
| H80 | -3.9171 | 2.0534  | 4.1881  |
| H81 | -2.2618 | 1.1352  | 2.6108  |
| H82 | -1.6604 | 1.5901  | -2.9641 |
| H83 | -2.9734 | 2.7626  | -4.6945 |
| H84 | -5.7937 | 4.1329  | -1.7543 |
| C85 | 0.1914  | -2.6462 | 0.2266  |
| C86 | -0.0993 | -3.4695 | -0.9506 |
| C87 | 0.537   | -3.2052 | 1.4226  |
| C88 | -0.4523 | -2.9172 | -2.1748 |
| C89 | 0.0088  | -4.9165 | -0.745  |
| C90 | 0.6293  | -4.6095 | 1.5763  |
| H91 | 0.7441  | -2.5633 | 2.2688  |
| C92 | -0.5596 | -1.4701 | -2.3808 |
| C93 | -0.7437 | -3.7405 | -3.3518 |

|      |         |         |         |
|------|---------|---------|---------|
| C94  | 0.3569  | -5.443  | 0.4649  |
| H95  | -0.1898 | -5.5881 | -1.565  |
| H96  | 0.9037  | -5.0387 | 2.5278  |
| C97  | -0.9078 | -0.9437 | -3.5907 |
| H98  | -0.3598 | -0.7985 | -1.5611 |
| C99  | -1.0892 | -3.1816 | -4.5479 |
| H100 | -0.6861 | -4.8149 | -3.2787 |
| H101 | 0.426   | -6.5171 | 0.5768  |
| C102 | -1.1809 | -1.7773 | -4.7018 |
| H103 | -0.9763 | 0.1304  | -3.7027 |
| H104 | -1.2969 | -3.8236 | -5.3939 |
| H105 | -1.4552 | -1.3481 | -5.6534 |
| H106 | -5.019  | 4.0266  | -4.1172 |
| H107 | -5.823  | 3.4199  | 3.4011  |
| H108 | -6.9619 | -2.2905 | -1.7321 |
| H109 | -3.8286 | -3.1935 | 5.0942  |
| H110 | 5.9147  | -4.2089 | -2.1403 |
| H111 | 5.5108  | -0.8838 | 4.6444  |
| H112 | 6.344   | 2.3387  | -3.6964 |
| H113 | 4.3681  | 5.5893  | 2.86    |

#### 4CzBN-ICz T<sub>2</sub>

|     |         |         |         |
|-----|---------|---------|---------|
| C1  | 0.1047  | -1.113  | 0.111   |
| C2  | -0.9243 | -0.3883 | 0.7657  |
| C3  | -1.0789 | 0.9949  | 0.528   |
| C4  | -0.1587 | 1.6562  | -0.3124 |
| C5  | 0.9518  | 0.9762  | -0.8584 |
| C6  | 1.0853  | -0.4119 | -0.6394 |
| C7  | -0.3215 | 3.056   | -0.5755 |
| N8  | -0.4555 | 4.1892  | -0.798  |
| N9  | 1.9192  | 1.7165  | -1.5741 |
| C10 | 2.7687  | 2.6968  | -1.0248 |
| C11 | 3.5997  | 3.2054  | -2.0477 |
| C12 | 3.223   | 2.534   | -3.2747 |
| C13 | 2.1834  | 1.6327  | -2.9518 |
| N14 | 2.2689  | -1.0684 | -1.0863 |
| C15 | 2.4427  | -1.9899 | -2.1343 |
| C16 | 3.7925  | -2.4165 | -2.1485 |

|     |         |         |         |
|-----|---------|---------|---------|
| C17 | 4.463   | -1.7505 | -1.0538 |
| C18 | 3.4983  | -0.9374 | -0.4176 |
| C19 | -2.2971 | -1.9964 | 3.7476  |
| C20 | -1.2268 | -1.5053 | 2.967   |
| N21 | -1.7285 | -1.0416 | 1.7356  |
| C22 | -3.1279 | -1.2036 | 1.7521  |
| C23 | -3.505  | -1.8052 | 2.9745  |
| C24 | -3.9568 | 3.1124  | 1.3095  |
| C25 | -3.3132 | 3.0214  | 2.604   |
| C26 | -2.1857 | 2.1828  | 2.4492  |
| N27 | -2.1267 | 1.744   | 1.1146  |
| C28 | -3.1938 | 2.3318  | 0.4131  |
| C29 | 3.6509  | 2.6468  | -4.6027 |
| C30 | 3.0474  | 1.8826  | -5.6012 |
| C31 | 1.9957  | 1.0111  | -5.2481 |
| C32 | 1.5493  | 0.8775  | -3.937  |
| C33 | 2.8703  | 3.1609  | 0.2873  |
| C34 | 3.8225  | 4.138   | 0.5596  |
| C35 | 4.6731  | 4.6616  | -0.4369 |
| C36 | 4.5516  | 4.1853  | -1.7418 |
| C37 | 5.7692  | -1.7974 | -0.5526 |
| C38 | 6.1148  | -1.0548 | 0.5765  |
| C39 | 5.1236  | -0.2698 | 1.2018  |
| C40 | 3.8177  | -0.2004 | 0.7245  |
| C41 | 1.5341  | -2.4848 | -3.0718 |
| C42 | 1.9934  | -3.3984 | -4.0154 |
| C43 | 3.3339  | -3.8344 | -4.0579 |
| C44 | 4.2273  | -3.3327 | -3.1135 |
| C45 | -4.0808 | -0.8963 | 0.7814  |
| C46 | -5.4128 | -1.1799 | 1.0632  |
| C47 | -5.8224 | -1.7718 | 2.2767  |
| C48 | -4.853  | -2.0879 | 3.2267  |
| C49 | -2.0482 | -2.5005 | 5.0292  |
| C50 | -0.7512 | -2.506  | 5.5428  |
| C51 | 0.2916  | -1.9802 | 4.7526  |
| C52 | 0.0744  | -1.4773 | 3.4723  |
| C53 | -3.5805 | 3.5936  | 3.8533  |
| C54 | -2.7337 | 3.3453  | 4.9334  |
| C55 | -1.6082 | 2.5171  | 4.7391  |

|     |         |         |         |
|-----|---------|---------|---------|
| C56 | -1.3165 | 1.9321  | 3.5105  |
| C57 | -3.5489 | 2.2145  | -0.9315 |
| C58 | -4.6819 | 2.8962  | -1.3652 |
| C59 | -5.4667 | 3.6844  | -0.4968 |
| C60 | -5.0938 | 3.7832  | 0.8435  |
| H61 | 4.45    | 3.3385  | -4.859  |
| H62 | 1.5146  | 0.4235  | -6.0266 |
| H63 | 0.7309  | 0.207   | -3.6996 |
| H64 | 2.2215  | 2.7911  | 1.0751  |
| H65 | 3.9083  | 4.515   | 1.5762  |
| H66 | 5.1963  | 4.5792  | -2.524  |
| H67 | 6.5161  | -2.4193 | -1.0406 |
| H68 | 5.3877  | 0.3064  | 2.0857  |
| H69 | 3.0823  | 0.4199  | 1.2251  |
| H70 | 0.494   | -2.1861 | -3.0757 |
| H71 | 1.2886  | -3.7908 | -4.7451 |
| H72 | 5.2659  | -3.6558 | -3.1245 |
| H73 | -3.8052 | -0.4586 | -0.1696 |
| H74 | -6.164  | -0.9372 | 0.3153  |
| H75 | -5.144  | -2.5501 | 4.1673  |
| H76 | -2.8706 | -2.8783 | 5.6325  |
| H77 | 1.3019  | -1.9649 | 5.1555  |
| H78 | 0.8989  | -1.0694 | 2.8974  |
| H79 | -4.4453 | 4.2405  | 3.981   |
| H80 | -0.9437 | 2.3264  | 5.5787  |
| H81 | -0.445  | 1.2972  | 3.3962  |
| H82 | -2.9633 | 1.6175  | -1.6241 |
| H83 | -4.9688 | 2.8219  | -2.4118 |
| H84 | -5.6869 | 4.3863  | 1.5269  |
| H85 | -6.3282 | 4.1974  | -0.8705 |
| H86 | -2.9259 | 3.7718  | 5.8958  |
| H87 | -6.8587 | -1.9689 | 2.4559  |
| H88 | -0.5433 | -2.9006 | 6.5154  |
| H89 | 3.6484  | -4.5376 | -4.8005 |
| H90 | 7.1118  | -1.0707 | 0.9646  |
| H91 | 3.3694  | 1.9501  | -6.6194 |
| H92 | 5.3888  | 5.4172  | -0.1883 |
| C93 | 0.1914  | -2.6462 | 0.2266  |
| C94 | -0.8268 | -3.3964 | -0.3786 |



|      |         |         |         |
|------|---------|---------|---------|
| C95  | 1.2805  | -3.1785 | 0.9277  |
| C96  | -0.7624 | -4.8696 | -0.2793 |
| H97  | -1.6339 | -2.8991 | -0.9023 |
| C98  | 1.3813  | -4.6486 | 1.0496  |
| H99  | 2.023   | -2.5224 | 1.3646  |
| C100 | 0.3397  | -5.3135 | 0.4263  |
| C101 | -1.4479 | -6.0536 | -0.6594 |
| C102 | 2.1902  | -5.677  | 1.5959  |
| N103 | 0.4162  | -6.6694 | 0.5286  |
| C104 | -2.6306 | -6.3167 | -1.3869 |
| C105 | -0.6951 | -7.1909 | -0.1438 |
| C106 | 1.5733  | -6.9568 | 1.2622  |
| C107 | 3.3897  | -5.6944 | 2.3452  |
| C108 | -3.0286 | -7.6264 | -1.5824 |
| H109 | -3.2152 | -5.4935 | -1.7847 |
| C110 | -1.1021 | -8.4928 | -0.3455 |
| C111 | 2.1217  | -8.1593 | 1.6529  |
| C112 | 3.9296  | -6.9071 | 2.7309  |
| H113 | 3.875   | -4.7608 | 2.6105  |
| C114 | -2.2808 | -8.7038 | -1.0725 |
| H115 | -3.9359 | -7.8324 | -2.1404 |
| H116 | -0.531  | -9.3279 | 0.0445  |
| C117 | 3.3113  | -8.1255 | 2.3939  |
| H118 | 1.6514  | -9.1021 | 1.3972  |
| H119 | 4.8496  | -6.9248 | 3.3057  |
| H120 | -2.6214 | -9.7189 | -1.2442 |
| H121 | 3.7617  | -9.059  | 2.7127  |

## Reference

- (1) Seung-Je Woo, Yeon-Hee Ha, Yun-Hi Kim, Jang-Joo Kim, *J. Mater. Chem. C*, **2020**, 8, 12075-12084
